# Supplementary material for: Unveiling the Impact of Gene Presence/Absence Variation in Driving Inter-Individual Sequence Diversity within the CRP-I Gene Family in Mytilus spp
Source: MDPI journal article supplement (doi:10.3390/genes14040787), 2023-03-24
Supplement: s1 [file s1]

## Supplementary Materials Note S1

DNA from the same individual (Anne - SAMN19838403) used to generate the *Mytilus edulis* PEIMed assembly (GCA\_019925275.1) was used to generate a PacBio HiFi library. The introgression of *Mytilus trossolus* or *M. galloprovincialis* was ruled out using 12 SNPs previously used to distinguish the member of the *Mytilus* species complex [1]. Sequencing was carried out by the Biotechnology Center and the University of Wisconsin – Madison. In total, 4 flow cells were used to generate the data with the Sequel2 sequencer. Calling of the CSS reads was done by the native PacBio software used by Sequel2. A total of 8,417,094 CSS reads were generated, resulting in coverage ~20X (Genome Size 1.65 Gb). Tissue samples from the same individual were also sent to Dovetail Genomics (Scotts Valley, CA). Dovetail extracted intact nuclei from muscle samples and constructed Omni-C proximity ligation libraries. Omni-C libraries were sequenced using a NovaSeq sequencer (Illumina, San Diego, CA).

We produced a primary/alternative phased assembly as well as haplotype-specific contigs using HiFiasm with the integration of the proximity ligation reads to improve phasing [2]. Putative contaminant sequences from other organisms were removed using blobtools2 [3] (Figure 1). The majority of contigs retained after filtering were putative molluscan sequences. Omni-C reads were mapped to the primary assembly using BWA [4]. The Arima genomics pipeline was used to map and process the mapped reads for scaffolding (GitHub - ArimaGenomics/mapping\_pipeline: Mapping pipeline for data generated using Arima-HiC). The primary assembly was scaffolded using SALSA2 [5,6] and pin\_hic [7]. Metrics for all assemblies can be found in table 1. All scaffolded assemblies had 14 major scaffolds that putatively represent the *M. edulis* chromosomes. The pin\_hic assembly had better contiguity than the one produced by SALSA2 (data now shown). Therefore, the pin\_hic assembly was used for downstream analysis.

Table 1. Contiguity and completeness metrics for all contig- and scaffold-level assemblies.

| Statistics            | Contigs           |                       |                |                | Scaffolds |                          |
|-----------------------|-------------------|-----------------------|----------------|----------------|-----------|--------------------------|
|                       | HiFiasm - Primary | HiFiasm - Alternative | HiFiasm - Hap1 | HiFiasm - Hap2 | PEIMed    | HiFiasm - Primary + Pins |
| # of Contigs          | 670               | 23318                 | 905            | 735            | 9686      | 670                      |
| # of Scaffolds        | NA                | NA                    | NA             | NA             | 1119      | 347                      |
| Total Length (Gb)     | 1.64              | 1.36                  | 1.33           | 1.35           | 1.65      | 1.64                     |
| Longest Contig (Mb)   | 84.40             | 1.30                  | 24.77          | 22.05          | 143.80    | 225.00                   |
| N50 (Mb)              | 16.64             | 0.20                  | 6.22           | 6.70           | 116.50    | 105.88                   |
| L50                   | 30                | 1807                  | 67             | 70             | 7         | 6                        |
| L90                   | 118               | 13911                 | 226            | 225            | 13        | 14                       |
| GC (%)                | 32.42             | 32.43                 | 32.42          | 32.39          | 32.20     | 32.36                    |
| Complete BUSCOS (%)   | 95.05             | NA                    | 93.73          | 94.06          | 90.43     | 95.05                    |
| Fragmented BUSCOS (%) | 0.33              | NA                    | 0.66           | 1.98           | 2.31      | 0.33                     |
| Missing BUSCOS (%)    | 4.62              | NA                    | 5.61           | 3.96           | 7.26      | 4.62                     |
| Merqry (C%, CV)       | 83.59, 50.2       | NA                    | 99.0, 50.1*    | 99.0, 50.1*    | 83.6, 30  | 83.50, 50.2              |

\*Combined Haplotypes

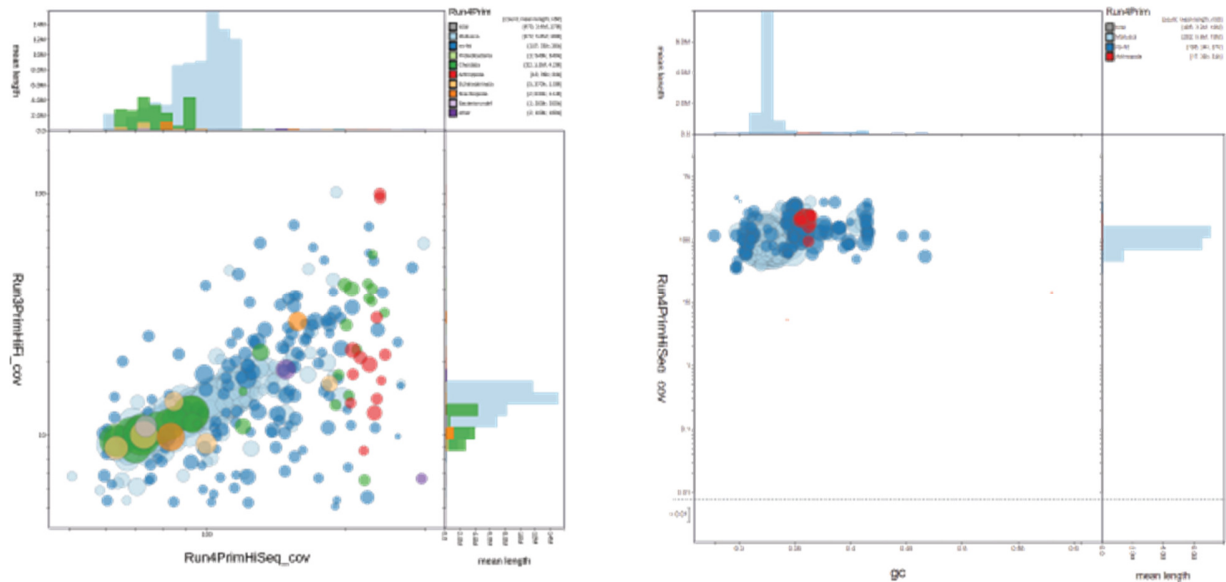

Figure 1. Blobtools2 plots before and after filtering.
