# Supplementary material for: Unveiling the Impact of Gene Presence/Absence Variation in Driving Inter-Individual Sequence Diversity within the CRP-I Gene Family in Mytilus spp
Source: Genes (Basel). 2023 Mar 24;14(4):787. doi: 10.3390/genes14040787 (PMC10138031; doi:10.3390/genes14040787)
Supplement: Supplementary file 1 [file genes-14-00787-s001.zip › Supplementary_tables.xlsx]

## Sheet: Table S1
Updated nomenclature of the CRP-I sequences previously reported in Gerdol et al. 2015
name	status	updated name
CRP-I1	confirmed	sCRP-I A1
CRP-I2	confirmed	sCRP-I B1
CRP-I3	confirmed	sCRP-I C1
CRP-I4	confirmed	sCRP-I D1
CRP-I5	reannotated	sCRP-I F1
CRP-I6	confirmed	sCRP-I G1
CRP-I7	confirmed	sCRP-I H1
CRP-I8	confirmed	sCRP-I H2
CRP-I9	confirmed	sCRP-I J3
CRP-I10	confirmed	sCRP-I L1
CRP-I11	pseudogene	/
CRP-I12	confirmed	sCRP-I E1
CRP-I13	confirmed	sCRP-I I1
CRP-I14	confirmed	sCRP-I K2
CRP-I15	redundant, deprecated	sCRP-I A1
CRP-I16	confirmed	sCRP-I G2
CRP-I17	confirmed	sCRP-I V1
CRP-I18	confirmed	sCRP-I M1
CRP-I19	confirmed	sCRP-I O1
CRP-I20	partial, deprecated	/
CRP-I21	confirmed	sCRP-I N1
CRP-I22	reannotated	sCRP-I P1
CRP-I23	confirmed	mCRP-I l1
CRP-I24	confirmed	sCRP-I A3
CRP-I25	confirmed	sCRP-I C2
CRP-I26	confirmed	sCRP-I L2
CRP-I27	pseudogene	/
CRP-I28	pseudogene	/
CRP-I29	partial, deprecated	/
CRP-I30	pseudogene	/
CRP-I31	redundant, deprecated	sCRP-I F1
CRP-I32	confirmed	sCRP-I D2
CRP-I33	confirmed	sCRP-I N3
CRP-I34	redundant, deprecated	sCRP-I H2
CRP-I35	confirmed	sCRP-I C3
CRP-I36	redundant, deprecated	sCRP-I I1
CRP-I37	redundant, deprecated	sCRP-I C3
CRP-I38	confirmed	sCRP-I Q1
CRP-I39	partial, deprecated	/
CRP-I40	reannotated	sCRP-I S1
CRP-I41	pseudogene	/
CRP-I42	CONFIRMED	sCRP-I V2
CRP-I43	pseudogene	/
CRP-I44	pseudogene	/
CRP-I45	confirmed	sCRP-I K3
CRP-I46	partial, deprecated	/
CRP-I47	pseudogene	/
CRP-I48	partial, deprecated	/
CRP-I49	confirmed	sCRP-I B2
CRP-I50	reannotated	sCRP-I T1
CRP-I51	confirmed	sCRP-I K4
multi-CRP-I 1	confirmed	mCRP-I e2
multi-CRP-I 2	confirmed	mCRP-I p1
multi-CRP-I 3	confirmed	mCRP-I h1
multi-CRP-I 4	pseudogene	/
multi-CRP-I 5	confirmed	mCRP-I k5
multi-CRP-I 6	confirmed	mCRP-I q1
multi-CRP-I 7	partial, deprecated	/
multi-CRP-I 8	reannotated	mCRP-I a3/a6
multi-CRP-I 9	partial, deprecated	/
multi-CRP-I 10	partial, deprecated	/
multi-CRP-I 11	pseudogene	/
multi-CRP-I 12	reannotated	mCRP-I b2
multi-CRP-I 13	pseudogene	/
multi-CRP-I 14	reannotated	mCRP-I d1
multi-CRP-I 15	partial, deprecated	/
multi-CRP-I 16	reannotated	mCRP-I o3

## Sheet: Table S2
List of all publicly available RNA-seq datasets used for the determination of CRP-I gene expression levels
SRA ID	BioProject	tissue
ERR4296979	PRJEB25106	Gill
ERR4296980	PRJEB25106	Digestive gland
SRR1042397	PRJNA230138	Hemocytes
SRR1045900	PRJNA230138	Hemocytes
SRR1046119	PRJNA230138	Gill
SRR2392495	PRJNA295512	Mantle
SRR2392762	PRJNA295512	Mantle
SRR2409049	PRJNA295512	Mantle
SRR6238445	PRJNA326100	Digestive gland
SRR6238447	PRJNA326100	Digestive gland
SRR6238448	PRJNA326100	Digestive gland
SRR6238449	PRJNA326100	Digestive gland
SRR6238450	PRJNA326100	Digestive gland
SRR6238451	PRJNA326100	Digestive gland
SRR6238452	PRJNA326100	Digestive gland
SRR6238453	PRJNA326100	Digestive gland
SRR6238454	PRJNA326100	Digestive gland
SRR6238455	PRJNA326100	Digestive gland
SRR7138608	PRJNA466718	Hemocytes
SRR7138609	PRJNA466718	Hemocytes
SRR7138610	PRJNA466718	Hemocytes
SRR7138611	PRJNA466718	Hemocytes
SRR7138612	PRJNA466718	Hemocytes
SRR7138613	PRJNA466718	Hemocytes
SRR7138614	PRJNA466718	Hemocytes
SRR7138615	PRJNA466718	Hemocytes
SRR7138616	PRJNA466718	Hemocytes
SRR7138617	PRJNA466718	Hemocytes
SRR7138618	PRJNA466718	Hemocytes
SRR7138619	PRJNA466718	Hemocytes
SRR7138620	PRJNA466718	Hemocytes
SRR7138621	PRJNA466718	Hemocytes
SRR7138622	PRJNA466718	Hemocytes
SRR7138623	PRJNA466718	Hemocytes
SRR7138624	PRJNA466718	Hemocytes
SRR7138625	PRJNA466718	Hemocytes
SRR7138626	PRJNA466718	Hemocytes
SRR7138627	PRJNA466718	Hemocytes
SRR7138628	PRJNA466718	Hemocytes
SRR7138629	PRJNA466718	Hemocytes
SRR7138630	PRJNA466718	Hemocytes
SRR7138631	PRJNA466718	Hemocytes
SRR7145578	PRJNA470760	Pooled hemocytes
SRR7145579	PRJNA470760	Pooled hemocytes
SRR7145580	PRJNA470760	Pooled hemocytes
SRR7145581	PRJNA470760	Pooled hemocytes
SRR7145582	PRJNA470760	Pooled hemocytes
SRR7145583	PRJNA470760	Pooled hemocytes
SRR7145584	PRJNA470760	Pooled hemocytes
SRR7145585	PRJNA470760	Pooled hemocytes
SRR7145586	PRJNA470760	Pooled hemocytes
SRR7145587	PRJNA470760	Pooled hemocytes
SRR7145589	PRJNA470760	Pooled hemocytes
SRR7145590	PRJNA470760	Pooled hemocytes
SRR7145591	PRJNA470760	Pooled hemocytes
SRR7145592	PRJNA470760	Pooled hemocytes
SRR7725722	PRJNA486919	Gill
SRR7725723	PRJNA486919	Gill
SRR7725724	PRJNA486919	Gill
SRR7725725	PRJNA486919	Gill
SRR7725726	PRJNA486919	Digestive gland
SRR7725727	PRJNA486919	Digestive gland
SRR7725728	PRJNA486919	Digestive gland
SRR7725729	PRJNA486919	Digestive gland
SRR8713540	PRJNA525609	Mantle
SRR8713541	PRJNA525609	Mantle
SRR8713542	PRJNA525609	Mantle
SRR8713544	PRJNA525609	Mantle
SRR8713545	PRJNA525609	Mantle
SRR8713546	PRJNA525609	Mantle
SRR8713547	PRJNA525609	Mantle
SRR8707268	PRJNA526432	Gill
SRR9984957	PRJNA560413	Mantle
SRR9984958	PRJNA560413	Mantle
SRR9984959	PRJNA560413	Mantle
SRR9984960	PRJNA560413	Mantle
SRR9984961	PRJNA560413	Mantle
SRR9984962	PRJNA560413	Mantle
SRR9984963	PRJNA560413	Mantle
SRR9984964	PRJNA560413	Mantle
SRR9984965	PRJNA560413	Mantle
SRR9984966	PRJNA560413	Mantle
SRR9984967	PRJNA560413	Mantle
SRR9984968	PRJNA560413	Mantle
SRR9984975	PRJNA560413	Mantle
SRR9984976	PRJNA560413	Mantle
SRR9984977	PRJNA560413	Mantle
SRR9984978	PRJNA560413	Mantle
SRR9984979	PRJNA560413	Mantle
SRR9984980	PRJNA560413	Mantle
SRR9984981	PRJNA560413	Mantle
SRR9984982	PRJNA560413	Mantle
SRR9984984	PRJNA560413	Mantle
SRR9984985	PRJNA560413	Mantle
SRR9984986	PRJNA560413	Mantle
SRR9984987	PRJNA560413	Mantle
SRR9984988	PRJNA560413	Mantle
SRR9984989	PRJNA560413	Mantle
SRR9984991	PRJNA560413	Mantle
SRR9984992	PRJNA560413	Mantle
SRR9984993	PRJNA560413	Mantle
SRR10015737	PRJNA561723	Digestive gland
SRR10015738	PRJNA561723	Digestive gland
SRR10015739	PRJNA561723	Digestive gland
SRR10015740	PRJNA561723	Digestive gland
SRR10015741	PRJNA561723	Digestive gland
SRR10015742	PRJNA561723	Digestive gland
SRR10015743	PRJNA561723	Digestive gland
SRR10015744	PRJNA561723	Digestive gland
SRR10015745	PRJNA561723	Digestive gland
SRR10015746	PRJNA561723	Digestive gland
SRR10015747	PRJNA561723	Digestive gland
SRR10015748	PRJNA561723	Digestive gland
SRR10015749	PRJNA561723	Digestive gland
SRR10015750	PRJNA561723	Digestive gland
SRR10015751	PRJNA561723	Digestive gland
SRR10015752	PRJNA561723	Digestive gland
SRR10015753	PRJNA561723	Digestive gland
SRR10015754	PRJNA561723	Digestive gland
SRR10015755	PRJNA561723	Digestive gland
SRR10015756	PRJNA561723	Digestive gland
SRR10015757	PRJNA561723	Digestive gland
SRR10015758	PRJNA561723	Digestive gland
SRR10015759	PRJNA561723	Digestive gland
SRR10015760	PRJNA561723	Digestive gland
SRR10015761	PRJNA561723	Digestive gland
SRR10015762	PRJNA561723	Digestive gland
SRR10015763	PRJNA561723	Digestive gland
SRR10015764	PRJNA561723	Digestive gland
SRR10015765	PRJNA561723	Digestive gland
SRR10015766	PRJNA561723	Digestive gland
SRR10015767	PRJNA561723	Digestive gland
SRR10015768	PRJNA561723	Digestive gland
SRR10015769	PRJNA561723	Digestive gland
SRR10015770	PRJNA561723	Digestive gland
SRR10015771	PRJNA561723	Digestive gland
SRR10015772	PRJNA561723	Digestive gland
SRR10015773	PRJNA561723	Digestive gland
SRR10015774	PRJNA561723	Digestive gland
SRR10015775	PRJNA561723	Digestive gland
SRR10015776	PRJNA561723	Digestive gland
SRR10015777	PRJNA561723	Digestive gland
SRR10015778	PRJNA561723	Digestive gland
SRR10015779	PRJNA561723	Digestive gland
SRR10015780	PRJNA561723	Digestive gland
SRR10015781	PRJNA561723	Digestive gland
SRR10015782	PRJNA561723	Digestive gland
SRR10015783	PRJNA561723	Digestive gland
SRR10015784	PRJNA561723	Digestive gland
SRR11996464	PRJNA638821	Gill
SRR11996686	PRJNA638821	Gill
SRR11996723	PRJNA638821	Gill
SRR11996734	PRJNA638821	Gill
SRR11996735	PRJNA638821	Gill
SRR11996743	PRJNA638821	Gill
SRR13013753	PRJNA675475	Gill
SRR13013754	PRJNA675475	Gill
SRR13013755	PRJNA675475	Gill
SRR13013756	PRJNA675475	Gill
SRR13013757	PRJNA675475	Gill
SRR13013758	PRJNA675475	Gill
SRR13013759	PRJNA675475	Gill
SRR13089323	PRJNA679634	Mantle
SRR13089324	PRJNA679634	Mantle
SRR13089325	PRJNA679634	Mantle
SRR13089328	PRJNA679634	Mantle
SRR13089329	PRJNA679634	Mantle
SRR13089332	PRJNA679634	Mantle
SRR16641561	PRJNA776346	Larvae
SRR16641562	PRJNA776346	Larvae
SRR16641563	PRJNA776346	Larvae
SRR16641564	PRJNA776346	Larvae
SRR16641565	PRJNA776346	Larvae
SRR16641566	PRJNA776346	Larvae
SRR16641567	PRJNA776346	Larvae
SRR16641568	PRJNA776346	Larvae
SRR16641569	PRJNA776346	Larvae
SRR16641570	PRJNA776346	Larvae
SRR16641571	PRJNA776346	Larvae
SRR16641572	PRJNA776346	Larvae
SRR17422212	PRJNA793756	Digestive gland
SRR17422213	PRJNA793756	Digestive gland
SRR17422214	PRJNA793756	Digestive gland
SRR17422215	PRJNA793756	Digestive gland
SRR17422216	PRJNA793756	Digestive gland
SRR17422217	PRJNA793756	Digestive gland
SRR17422218	PRJNA793756	Digestive gland
SRR17422219	PRJNA793756	Digestive gland
SRR17422220	PRJNA793756	Digestive gland
SRR17422221	PRJNA793756	Digestive gland
SRR17422222	PRJNA793756	Digestive gland
SRR17422223	PRJNA793756	Digestive gland
SRR17422224	PRJNA793756	Digestive gland
SRR17422225	PRJNA793756	Digestive gland
SRR17422226	PRJNA793756	Digestive gland
SRR17422227	PRJNA793756	Digestive gland
SRR17422228	PRJNA793756	Digestive gland
SRR17422229	PRJNA793756	Digestive gland
SRR17422230	PRJNA793756	Digestive gland
SRR17422231	PRJNA793756	Digestive gland
SRR17422232	PRJNA793756	Digestive gland
SRR17422233	PRJNA793756	Digestive gland
SRR17422234	PRJNA793756	Digestive gland
SRR17422236	PRJNA793756	Digestive gland
SRR17422237	PRJNA793756	Digestive gland
SRR17422238	PRJNA793756	Digestive gland
SRR17422239	PRJNA793756	Digestive gland
SRR17422240	PRJNA793756	Digestive gland
SRR17422241	PRJNA793756	Digestive gland
SRR442031	PRJNA88481	Digestive gland
SRR442032	PRJNA88481	Digestive gland
SRR442033	PRJNA88481	Digestive gland
SRR442034	PRJNA88481	Digestive gland
SRR442035	PRJNA88481	Digestive gland
SRR442036	PRJNA88481	Digestive gland

## Sheet: Table S3
Complete list of the sCRP-I and mCRP-I sequences reported in this paper
subfamily	sequence name	precursor protein sequence	mature peptide
sCRP-I	A1	MKFAVCLVVCVLLVVVEVNMANGERLEDNGFLQKLEKRAVSCGTYRKSCSFRKCCSGYTCSYGRCRSSYGK	AVSCGTYRKSCSFRKCCSGYTCSYGRCRSSYGK
sCRP-I	A2	MKFAVCLVACLMLVFVGVNIANGEILEDNGFLQKLEKRAVSCGTYRKSCSFRKCCSGYTCSYGRCRSSYGR	AVSCGTYRKSCSFRKCCSGYTCSYGRCRSSYGR
sCRP-I	A3	MKFAVCLVACVMLVFVGVNIANGEILEDNGFLQKLEKRAVSCGTYRKSCSFRKCCSGYICSYGRCRSSYGR	VSCGTYRKSCSFRKCCSGYICSYGRCRSSYGR
sCRP-I	A4	MKFAVCLVVCVFLVVVEVNMANGERLEDNGFLQKLEKRALSCGTYRKSCSFRKCCSGYTCSYGRCRSSYGK	ALSCGTYRKSCSFRKCCSGYTCSYGRCRSSYGK
sCRP-I	A5	MKFAVCLVVCVFLVVVEVNMANGERLEDNGFLQKLEKRAVSCSTYRKSCSFRKCCSGYTCSYGRCRSSYGK	AVSCSTYRKSCSFRKCCSGYTCSYGRCRSSYGK
sCRP-I	A6	MKFAVCLVACVLLVFVGVNMSNGKMLEDNGFLQKLEKRAVSCGTYRKSCSFRKCCSGYTCLYGRCRSSYRK	AVSCGTYRKSCSFRKCCSGYTCLYGRCRSSYRK
sCRP-I	B1	MKVSFFLIVSLLLMSVGVNMANAEMLKDNGLRQKLVKRSPGCGRRSCPCCPGYTCVSGRCYGH	SPGCGRRSCPCCPGYTCVSGRCYGH
sCRP-I	B2	MKVSFFLIVSLLLMFVGVNMANEKMLKDNGLRQKLVKRSPKCGRRLCPCCLGYTCVSGRCHAH	SPKCGRRLCPCCLGYTCVSGRCHAH
sCRP-I	B3	MKVSFVLIVSLLLMFVGVNMANEEMLKDNGLRQRLVKRSPGCSRRSCPCCPGYTCVSGRCFGH	SPGCSRRSCPCCPGYTCVSGRCFGH
sCRP-I	B4	MKVSFFLIVSLLLMFVGVNMANEKMLKDNGLRQKLVKRSSGCGRRLCPCCLGYTCVSGRCHAH	SSGCGRRLCPCCLGYTCVSGRCHAH
sCRP-I	B5	MKVSFFLIVSLLLMSVGVNMANAEMLKDNGLRQKLVKRSPGCGRISCPCCLGYTCVSGRCHAH	SPGCGRISCPCCLGYTCVSGRCHAH
sCRP-I	B6	MQVSFFLIVSLLLMSVGVNMANEEMLKDNGLRQKLVKRSPGCGRRSCPCCPGYTCVSGHCYGH	SPGCGRRSCPCCPGYTCVSGHCYGH
sCRP-I	C1	MKVSVCIVLCLLLAFAGTSTAKEETFGKRLLSRMRRAPGYCSAVGVSCGSDLACCSKKCAYGKCF	APGYCSAVGVSCGSDLACCSKKCAYGKCF
sCRP-I	C2	MKVSVCIVLCLLLAFAGTSTAKEETFGKRLLSRMRRAGYCSAVGVSCGSDLACCSKKCAYGKCY	AGYCSAVGVSCGSDLACCSKKCAYGKCY
sCRP-I	C3	MKVSVCIVLCLLLAFAGTSTAKEETFGKRLLSRMRRAGYCSAVGVSCGSDLACCSKNCAYGKCY	AGYCSAVGVSCGSDLACCSKNCAYGKCY
sCRP-I	C4	MKVSVCIVLCLLLAFAGTSTAKEETFGKRLLSRMRRAGYCSAVGVSCDSDLACCSKKCAYGKCF	AGYCSAVGVSCDSDLACCSKKCAYGKCF
sCRP-I	C5	MKVSVCIVLCLLLAFAGTSTAKEETFGKRLLSRMRRAGYCSAIGVSCDSDLACCSKKCAYGKCF	AGYCSAIGVSCDSDLACCSKKCAYGKCF
sCRP-I	C6	MKVSVCIVLCLLLAFAGTSTAKAETFGKRLLSRMRRAGYCSAVGVSCGSDLACCSKDCAYGKCF	AGYCSAVGVSCGSDLACCSKDCAYGKCF
sCRP-I	C7	MKVSVCIVLCLLLAFAGTSTATKEETLAKRLLSRMRRAGYCSAVGVSCGSDLACCSKTCAYGKCY	LLSRMRRAGYCSAVGVSCGSDLACCSKTCAYGKCY
sCRP-I	D1	MKVSICLFICLLFVSVGVNMAHEEMLEENGFMHELVKRSVCSGKPCHTNRHCCKGWMCYGRKCKRYGG	SVCSGKPCHTNRHCCKGWMCYGRKCKRYGG
sCRP-I	D2	MKFSICLFICLLFVSVGVNMAHEEMLEENGFMHELVKRSVCSGKPCHTNRHCCRGWRCYGRKCKRYGG	SVCSGKPCHTNRHCCRGWRCYGRKCKRYGG
sCRP-I	D3	MKVSICLFICLLFVSVGVNMAHEEMLEENGFMHELVKRSVCSGKPCHTNRHCCRGWMCYGRKCKRYGG	SVCSGKPCHTNRHCCRGWMCYGRKCKRYGG
sCRP-I	D4	MKVSICLFICLLFVSVGVNMAHEEMLEENGFMHELVKRSACSGKPCHTNRHCCKGWMCYGRKCKRYGG	SACSGKPCHTNRHCCKGWMCYGRKCKRYGG
sCRP-I	F1	MKISVFLVVCMLIMSVGVTMAKDEMLEDNGLIHNRIKRYSCWPRKCYTRRDCCSSHLCISGWCTGRKG	YSCWPRKCYTRRDCCSSHLCISGWCTGRKG
sCRP-I	F2	MKISVFLVVCMLIMSVGVTMAKDEMLEDNGLIHNRIKRSSCWPRKCYTRRDCCSSHLCISGWCTGRKG	SSCWPRKCYTRRDCCSSHLCISGWCTGRKG
sCRP-I	F3	MKISVFLVVCMLIMSVGVTMAKDEMLEDNGLIHNRIKRYSCWPRKCYTMRDCCSSHLCISGWCTGRKG	YSCWPRKCYTMRDCCSSHLCISGWCTGRKG
sCRP-I	F4	MKISVFLVVCMLIMSVGVTMAKDEMLEDNGLIHNRIKRYSCWPRKCYTRRDCCSSLLCISGWCTGRKG	YSCWPRKCYTRRDCCSSLLCISGWCTGRKG
sCRP-I	G1	MKVSVCLVVFMLLVSMGGNMAKEDMLEDNGLIHELVKRQACWGRTCRRHSHCCRGYYCYRRRCRRD	QACWGRTCRRHSHCCRGYYCYRRRCRRD
sCRP-I	G2	MKVAVCLVVFMLLVAVGGNMAMEDMLEDNGLIHKLVKRQACWGRTCRRHSHCCRGYYCYRRRCRFN	QACWGRTCRRHSHCCRGYYCYRRRCRFN
sCRP-I	G3	MKVAVCLVVFMLLVSVGGNMAMEDMLEDIGLIHKLVKRQACWGRTCRRHSHCCRGYYCYRRRCSRD	QACWGRTCRRHSHCCRGYYCYRRRCSRD
sCRP-I	G4	MKVAVCLVVFVLLVAVGGNMAKEDMLEDNGLIHKLVKRQACWGRTCRRHSHCCRGYYCYRMRCRRD	QACWGRTCRRHSHCCRGYYCYRMRCRRD
sCRP-I	G5	MKVAVCLVVFMLLVAVGGNMAKEDMLEDNGLIHKVVKRQACWGRTCRRNSHCCRGYYCYRRRCRRD	QACWGRTCRRNSHCCRGYYCYRRRCRRD
sCRP-I	H1	MKISVCLVACLLLMSVGVNMANDEMLEDNELSHARVKRAPCWPRGCFRDRDCCYGYQCSYRKCMRKRG	APCWPRGCFRDRDCCYGYQCSYRKCMRKRG
sCRP-I	H2	MQISVCLVACLLLMSVGVNMANDEMLEENGLIHDRVKRAPCWPRGCFRDRDCCYGYHCSYRKCMRKRG	APCWPRGCFRDRDCCYGYHCSYRKCMRKRG
sCRP-I	H3	MQISVCLVACLLLMSVGVNMANDEMMEDNGLSHDRVKRAPCWPRRCSRNRDCCYGYYCSYRKCQRKRG	APCWPRRCSRNRDCCYGYYCSYRKCQRKRG
sCRP-I	H4	MKISVCLVACLLLMSVGVNMANDEMLEDNGLSHARVKRAPCWPRGCFGNRDCCYGYQCSYRKCMRKRG	APCWPRGCFGNRDCCYGYQCSYRKCMRKRG
sCRP-I	H5	MKISVCLVACLLLMSVGVNMANDEMLEDNGLSHDRVKRAPCWPRGCFRDRDCCYGYQCSYRKCMRKRG	APCWPRGCFRDRDCCYGYQCSYRKCMRKRGL
sCRP-I	H6	MQISVCLVACLLLMSVGVNMANDEMLEDNGLIHDRVKRAPCWPRGCFRNRDCCYGYHCSYRKCMRKRG	APCWPRGCFRNRDCCYGYHCSYRKCMRKRG
sCRP-I	H7	MKISVCLVACLLLVSVGVNMANDEMLEDNGLSHARVKRAPCWPRGCFRDRDCCYGYHCSYRKCIRKRG	APCWPRGCFRDRDCCYGYHCSYRKCIRKRG
sCRP-I	H8	MKISICLVACLLLMSVGVNMANDEMLEDNGLSHARVKRAPCWPRGCFRDRDCCYGFQCSYRKCMRKRG	APCWPRGCFRDRDCCYGFQCSYRKCMRKRG
sCRP-I	H9	MQISVCLVACLLLMSVGINMANDEMLEDNGLIHDRVKRAPCWPRGCFRNLDCCYGYQCSFRKCMRKRG	APCWPRGCFRNLDCCYGYQCSFRKCMRKRG
sCRP-I	H10	MQISVCLVACLLLMSVGVNMANDEMLEDNGLIHRVKRAPCWTRRCSRNRDCCYGYYCSYRKCQRKRG	APCWTRRCSRNRDCCYGYYCSYRKCQRKRG
sCRP-I	H11	MQISVCLVACLLLMSVGVNMANDEMLEDNGLIHDRVKRAPCWPRGCFRDRDCCYGYHCSYRKCMHKRG	APCWPRGCFRDRDCCYGYHCSYRKCMHKRG
sCRP-I	J1	MKVFVCFVACMLIMSVGVSMANDEMMADNELVHDRVKRAPCYNRRCFTNYQCCTGYRCSYRRCVRRRG	APCYNRRCFTNYQCCTGYRCSYRRCVRRRG
sCRP-I	J2	MKVFVCLVACMLIMSVGVSMANDEMMEDNELTHDRVKRAPCYNRRCFTSYQCCPRYRCSYRRCVRKRG	APCYNRRCFTSYQCCPRYRCSYRRCVRKRG
sCRP-I	J3	MKVFVCLVACMLLMSVGVSMANDEMMEDNELTHDRVKRAPCYNRRCVTSYQCCSGYRCSYRRCVRRKG	APCYNRRCVTSYQCCSGYRCSYRRCVRRKG
sCRP-I	J4	MKVFVCLVACMLLMSFGVIMANDEMMEDNELTHDRVKRAPCYNRRCFTSYQCCSGYRCSYRRCVRRRG	APCYNRRCFTSYQCCSGYRCSYRRCVRRRG
sCRP-I	J5	MKVFVCLVACMLLMSVGVSMANDEMMEDNELTHDRVKRAPCYNRRCFTSYQCCSGYRCSYRMCIRRRG	APCYNRRCFTSYQCCSGYRCSYRMCIRRRG
sCRP-I	J6	MKVFVCFVACMLIMSVGVSMANDEMMEDNELVHDRVKRAPCYNRRCFTSYQCCTGYRCSYRRCVRRRG	APCYNRRCFTSYQCCTGYRCSYRRCVRRRG
sCRP-I	J7	MKVFVCLVACMLLISVGVIMANDEMMEDNELSHDRVKRAPCYNRRCFTSYQCCPGYRCSYRRCVRKRG	APCYNRRCFTSYQCCPGYRCSYRRCVRKRG
sCRP-I	J8	MKVFVCFVACMLIMSVGVSMANDEMIEDNELVHDRVKRAPCYNRRCLTSYQCCTGYRCSYRRCVRWRG	APCYNRRCLTSYQCCTGYRCSYRRCVRWRG
sCRP-I	I1	MKVFVCLVACMLLMSIGVSMANDEMMEDNGLIHERVKRAPCWQRRCTFNFQCCYGYTCSYRRCVRKRG	APCWQRRCTFNFQCCYGYTCSYRRCVRKRG
sCRP-I	I2	MKVFVCLVACMLFMSIGVSMANDEIMDDNGLIHERVKRAPCWQRRCTFNFQCCYGYTCSYKRCVRKRG	APCWQRRCTFNFQCCYGYTCSYKRCVRKRG
sCRP-I	W1	MKVSVCLVVLILFVSFGFMLANELGLEENEHIHQLAKRSPQCFMRRCIKFIQCCLGYICSFLRCIRRIG	SPQCFMRRCIKFIQCCLGYICSFLRCIRRIG
sCRP-I	W2	MNVSVSLVVLILLVSFGFMFANELALEENEHIHQLAKRSPQCFMRRCIKFIQCCLGYICSFFRCIRRIG	SPQCFMRRCIKFIQCCLGYICSFFRCIRRIG
sCRP-I	L1	MKVYIGLIVCLMLVGVNMAHEEMFEDYSLIHKLVKRQMVITCRGKACTHDSQCCRFHKCFGVCRRA	QMVITCRGKACTHDSQCCRFHKCFGVCRRA
sCRP-I	L2	MKVYIGLIVCLMLVGVNMAHEEMFEDNSLIHKLVKRQFFTCRGKACTHDSQCCRFHKCFGVCRRA	QFFTCRGKACTHDSQCCRFHKCFGVCRRA
sCRP-I	L3	MKVYIGLIVYLMLVGVNMAHEEMFEDNSLIHKLVKREIFTCRGKACTHDSQCCRFHKCFGVCRRA	EIFTCRGKACTHDSQCCRFHKCFGVCRRA
sCRP-I	L4	MKVNIGLIVCLMLVGVNMAHEEMFEDNSLIHKLVKRQMFTCRGKACTHDSQCCRFHKCFGVCRRA	QMFTCRGKACTHDSQCCRFHKCFGVCRRA
sCRP-I	L5	MKVYIGLIVCLMIVGVNMAHEEMFEDNSLIHKLVKRQSFTCRGKACTHDSQCCRFHKCFGVCRRA	QSFTCRGKACTHDSQCCRFHKCFGVCRRA
sCRP-I	L6	MKVNIGLIVCLMLVGVNMAHEEMFEDNSLIHKLVKRQIFTCRGKACTRDSQCCRFHKCFGVCRRG	RQIFTCRGKACTRDSQCCRFHKCFGVCRRG
sCRP-I	E1	MKVYICLFICLLFVSVGVNMAHDEMFEDNDLAHRLVKRRSINSDRRYRTKRSCCRWGG	SINSDRRYRTKRSCCRWGG
sCRP-I	K1	MKISVCILLCLMLAFVGTSIANEETLGNRLLSRERRLAPRSCLSYGNRCRSRSRCCSYKCVYGYCK	LAPRSCLSYGNRCRSRSRCCSYKCVYGYCK
sCRP-I	K2	MKISVCIVLCLMLAFVGTSIANEETLGNRLLSRERRRAPRVCLSYGNRCQSRSRCCSYRCVYGYCK	APRVCLSYGNRCQSRSRCCSYRCVYGYCK
sCRP-I	K3	MKISVCILLCLMLAIVGTSIANEETLGNRLLSRERRRAPPPFCLSYGQRCRSASKCCSYRCVYGYCK	APPPFCLSYGQRCRSASKCCSYRCVYGYCK
sCRP-I	K4	MKISVCIVLCLMLAFVGTSIANEETLGNRLLSRERRRAPRSCLSYGNRCRSRSRCCSYRCVYGYCK	APRSCLSYGNRCRSRSRCCSYRCVYGYCK
sCRP-I	K5	MKISVCILLCLMLAFVGSNIANEETLGNRLLSRERRLAPRPCLSYGNRCRSRSRCCSYKCVYGYCK	APRPCLSYGNRCRSRSRCCSYKCVYGYCK
sCRP-I	K6	MKISVCIVLCLMLAFVGTSIANEETLGNRLLSRERRRAPRVCLSYGNRCQSRSRCCSYKCVYGYCK	APRVCLSYGNRCQSRSRCCSYKCVYGYCK
sCRP-I	K7	MKISVCIVLCLMLAFVGTSIANEETLGNRLLSRERRRAPPPFCLSYGHRCRSASKCCSYRCVYGYCK	PPPFCLSYGHRCRSASKCCSYRCVYGYCK
sCRP-I	K8	MKISVCIVLCLMLAFVGTSIANEETLGNRLLSRERRRAPPPFCLSHGHRCRSASKCCSYRCVYGYCK	PPPFCLSHGHRCRSASKCCSYRCVYGYCK
sCRP-I	V1	MKISVWLIVSLLLVFSEVNMANEEMQDGNRFLEKLVKRSVGVGVHRGCKGRPCSFSNSCCHKHRCSNGYCDIIHGK	SVGVGVHRGCKGRPCSFSNSCCHKHRCSNGYCDIIHGK
sCRP-I	V2	MNISVWLFVSLLLVYSEVNMANNEMQDGNRFLEKLVKRSVGVGVHRGCIGRPCSFTNSCCHKHRCSNGYCDIIHGK	SVGVGVHRGCIGRPCSFTNSCCHKHRCSNGYCDIIHGK
sCRP-I	V3	MKISVWLIVSLLLAFSEVNMANEEMQDGNRFPEKLVKRSVGVGVHRGCMGRPCSFSNSCCHKHRCSNGYCDIIHGK	SVGVGVHRGCMGRPCSFSNSCCHKHRCSNGYCDIIHGK
sCRP-I	V4	MKISVWLIVSLLLVFSEVNMANEEMQDGNRFLEKLVKRSAGVGVHRGCKGRPCSFSNSCCHKHRCSNGYCDIIHGK	SAGVGVHRGCKGRPCSFSNSCCHKHRCSNGYCDIIHGK
sCRP-I	M1	MQGSVCLVVCLFLVSSGVNMATEDMLDDSGLNKERFKRGTPCERPCYNSYQCCTGWRCSYRKKCTPRFTIG	GTPCERPCYNSYQCCTGWRCSYRKKCTPRFTIG
sCRP-I	M2	MHGSVCLVVCLILVFTGVNMATEDMLEDSGLNQERFKRGTLCERPCYNSYQCCTGWRCSYRKKCTPRFTIG	GTLCERPCYNSYQCCTGWRCSYRKKCTPRFTIG
sCRP-I	M3	MQGSVCFIVCLFLLSVGINMATENMLEDNGLNQERFKRGIPCERTCYNSYQCCTGWRCSYRKKCTPKFIIG	GIPCERTCYNSYQCCTGWRCSYRKKCTPKFIIG
sCRP-I	M4	MQGSVCLVVCLILVFTGVNMATEDMLEDSGLNQERFKRGTPCERPCYNSYQCCTGWRCSYRKKCTPRFTTG	GTPCERPCYNSYQCCTGWRCSYRKKCTPRFTTG
sCRP-I	M5	MQGSVCLIVCLFLLSVGVNMATEDVLAYNGLNQERFKRGTPCERTCYNSYQCCTGWRCSYRKKCTPKFIIG	GTPCERTCYNSYQCCTGWRCSYRKKCTPKFIIG
sCRP-I	M6	MQGSVCLVVCLILVFTGVNMATEDMLVDSGLNQERFKRGTPCERPCYNSYQCCTGWRCSFRKKCTPRFTIG	GTPCERPCYNSYQCCTGWRCSFRKKCTPRFTIG
sCRP-I	M7	MQGSVCLVVCLILVSTGVNMATEDMLEDSGLNQERFKRGTPCERPCYNSYQCCTGWRCSYRKKCTQLFTIG	GTPCERPCYNSYQCCTGWRCSYRKKCTQLFTIG
sCRP-I	M8	MQGSVCLIVCLFLLSVGVNMATEDMLEDNGLNQERFKRGTPCERPCYNSYQCCTGWRCSYRKKCTPLFIIG	GTPCERPCYNSYQCCTGWRCSYRKKCTPLFIIG
sCRP-I	M9	MQGSVCLVVCLFLVSSGVNMATEDMLEDSGLNQERFKRGTPCERPCYHSYQCCTGWRCSYRKKCTPRFTIG	GTPCERPCYHSYQCCTGWRCSYRKKCTPRFTIG
sCRP-I	N1	MQVSVCLVVCLFVVSIGVNMATEDILEKNGINHELFKRSSRCERPCYTSYQCCKGWTCSNRKCDLRLHIG	SSRCERPCYTSYQCCKGWTCSNRKCDLRLHIG
sCRP-I	N2	MQVSVCLVVCLFVVSIGVNMATEDLLEDNGIIHELFKRSYRCERPCYTSYQCCKGWTCSNRKCDLRLYIG	SYRCERPCYTSYQCCKGWTCSNRKCDLRLYIG
sCRP-I	N3	MQVSVCLVVCLFVVSIGVNMATEDMLEDNGINHELFKRSSRCERPCYTSYQCCKGWFCSSKGKCDFMLHIG	SSRCERPCYTSYQCCKGWFCSSKGKCDFMLHIG
sCRP-I	N4	MQVSVCLVVCLFVVSIGVNMATEDLLEDNGIIHELFKRSSRCERPCYTSYQCCKGWTCSNRKCDLRLYIG	SSRCERPCYTSYQCCKGWTCSNRKCDLRLYIG
sCRP-I	N5	MQVSVCLVVCLFVVSIGVNMATEDMLEDNGIIHELFKRSSRCERPCYTSYQCCKGWFCSVKRKCDLMLHTG	SSRCERPCYTSYQCCKGWFCSVKRKCDLMLHTG
sCRP-I	N6	MQVSVCLVVCLFVVSIGVNMATEDLLEDNGIIHELFKRSYRCERPCYTSYQCCKGWTCSNRKCDLRLHIG	SYRCERPCYTSYQCCKGWTCSNRKCDLRLHIG
sCRP-I	N7	MQVSVCLVVCLFVVSIGVNMATEDMLENNGINHELFKRSYRCERPCYTSYQCCKGWTCSNRKCDRRLHIG	SYRCERPCYTSYQCCKGWTCSNRKCDRRLHIG
sCRP-I	N8	MQVSVCLVVCLFVVSIGVNMATEDMLENNGIIHELFKRSSRCERPCNTSYQCCKGWFCSSKGKCDFMLHIG	SSRCERPCNTSYQCCKGWFCSSKGKCDFMLHIG
sCRP-I	N9	MQVSVCLVVCLFVVSIGVNMATEDMLEDNGINHELFKRSSRCERPCFTSYQCCKGWFCSSKRKCDLMLHIG	SSRCERPCFTSYQCCKGWFCSSKRKCDLMLHIG
sCRP-I	O1	MKVFLGLAVCLCLVSIGVSMANEELLENNSFFHKLVKRQGCNKPCKGIHDHDCCKGWYCHHVICVQE	QGCNKPCKGIHDHDCCKGWYCHHVICVQE
sCRP-I	O2	MKVFLGLVVCLFLVSIGVSMANEELLENNSFFHKLVKRQGCNKPCKGIHDHDCCKGWYCHHVICVHRHG	QGCNKPCKGIHDHDCCKGWYCHHVICVHRHG
sCRP-I	O3	MKVFLGLAVCLFLMSIGVSMANEELLENNSFFHKLVKRQGCNKPCKGIHDHDCCKGWYCHHVMCVHRHG	QGCNKPCKGIHDHDCCKGWYCHHVMCVHRHG
sCRP-I	P1	MKVYLCLIICLLLVCVGVNLAKEEMSENDGLIHELVKRSACQRRLCHGNRDCCRFDLCFMGRCMRFRQR	SACQRRLCHGNRDCCRFDLCFMGRCMRFRQR
sCRP-I	P2	MKVYPCLIICLLLVCVGVNLAKEEMSENDGLIHELVKRSACQRRLCHGNRDCCRFDRCFMGRCRRFRQR	SACQRRLCHGNRDCCRFDRCFMGRCRRFRQR
sCRP-I	P3	MKVYLCLIICLLLVCVGVNLAKEEMSEDDGIIHELVKRSACQRRICHGNRDCCRFDRCFMGKCTRFRQR	SACQRRICHGNRDCCRFDRCFMGKCTRFRQR
sCRP-I	P4	MKVYLCLIICLLLVCVGVNLAKEEMSEDDGIIHELVKRSACQRRLCHGNRDCCRFDRCFMGRCTRFRQR	SACQRRLCHGNRDCCRFDRCFMGRCTRFRQR
sCRP-I	P5	MKVYLCLIICLLLVCVGVNLAKEEMSENDGLIHELVKRSACQRRLCHGNRDCCRFDRCFMGRCMRFRQR	SACQRRLCHGNRDCCRFDRCFMGRCMRFRQR
sCRP-I	P6	MKVYLCLIICLLLVCVGVNLAKEEMSEDHGLIHELVKRSACQRRLCHGNRDCCRFDRCFMGKCTRFRQR	SACQRRLCHGNRDCCRFDRCFMGKCTRFRQR
sCRP-I	P7	MKVYLCVTICVLLVCVGVNMAKEEMSENDELIHELVKRSACQRRLCHGNRDCCRFDRCFMGKCQRFRQR	SACQRRLCHGNRDCCRFDRCFMGKCQRFRQR
sCRP-I	P8	MKVYLCLIICLLLVCVGVNLAKEEMSEDDGIIHELVKRSACQRRICHGNRDCCRFDRCFMGRCTRFRQR	SACQRRICHGNRDCCRFDRCFMGRCTRFRQR
sCRP-I	P9	MKVYPCLIICLLLVCVGVNLAKEEMSENDGLIHELVKRSACQRRLCHGNRDCCRFDRCFIGRCRRFRQR	SACQRRLCHGNRDCCRFDRCFIGRCRRFRQR
sCRP-I	P10	MKVYLCLIICLLLVCVGVNLAKEEMSENDGLIHELVKRSACQRRLCHGNRDCCRFDRCFMGKCLRFRQR	SACQRRLCHGNRDCCRFDRCFMGKCLRFRQR
sCRP-I	P11	MKVYLCLIICLLLVCVGVNLAKEEMSENDGLIHELVKRSACQRILCHGNRDCCRFDRCFMGRCMRFRQR	SACQRILCHGNRDCCRFDRCFMGRCMRFRQR
sCRP-I	Q1	MQVSLCFVCSLLLVFVGVSMTNGEALGYNGFIKNLVKRAAPDLCGYDGDSCAYRQCCNGYTCSYETCIRDNNYG	AAPDLCGYDGDSCAYRQCCNGYTCSYETCIRDNNYG
sCRP-I	R1	MQVSLCVVLSLLLVFVGVNTANVEAYEDNGFIQKLGKRSTAACGMMSCSNDFHCCHGFTCSYGKCMYTQERDKTLTI	STAACGMMSCSNDFHCCHGFTCSYGKCMYTQERDKTLTI
sCRP-I	S1	MKVSVCLIISLLLVFAEVNMANEEMLEDNGLLEKLVKRSVGCIGRSCSVFHPCCFRHKCSYGQCTYGYGK	SVGCIGRSCSVFHPCCFRHKCSYGQCTYGYGK
sCRP-I	S2	MKVSVSLIVCLMLVFAEVSMAKEQMLEDNELLEKLVKRSVGCSGRPCSRFSPCCYRHKCDYGQCTYGYGK	SVGCSGRPCSRFSPCCYRHKCDYGQCTYGYGK
sCRP-I	S3	MKVSVCLIISLLLVFAEVNKANEEMLEDNGLLEKLVKRSVGCIGRSCSVFNPCCFRHTCSYGQCTYGYGK	SVGCIGRSCSVFNPCCFRHTCSYGQCTYGYGK
sCRP-I	S4	MKVSICLIVSLLLVFAEVNMANEEMLKDNGLPDELVKRSIGCIGRYCSLFNPCCYRHKCSYGKCTYGYGK	SIGCIGRYCSLFNPCCYRHKCSYGKCTYGYGK
sCRP-I	T1	MKVHVRLVVCLLLFIMKVNTSNAQVPEDEEREGVKPPGQQAKRSTRCRGRLDKCRYGSYCCSGLTCHLNVCIYSFIAKN	STRCRGRLDKCRYGSYCCSGLTCHLNVCIYSFIAKN
sCRP-I	U1	MKVYVCLLVCLLVLIKVNMVNMANPKEEVEFGDGVKIPPVKRSARCRGRFEKCIIGSHCCSGLTCHLNVCRYSVVARK	SARCRGRFEKCIIGSHCCSGLTCHLNVCRYSVVARK
mCRP-I	a1	MKMSICLVASLLLVFVGASMANDEMMEDNELANHLVKRSVIPSPPCADDGANCRKSSCCPGSTCVYGNCKSCNPRKCKKARDCCDQSSCVYGNCKSCNPRKCKKTRDCCDDSSCVYGNCKSCRARTCKGKNDCCRGYTCSYKKCVKKD	SVIPSPPCADDGANCRKSSCCPGSTCVYGNCKSCNPRKCKKARDCCDQSSCVYGNCKSCNPRKCKKTRDCCDDSSCVYGNCKSCRARTCKGKNDCCRGYTCSYKKCVKKD
mCRP-I	a2	MKMSICLVASLLLVFVGASMANDEMMEDNELANHLVKRSVIPSPPCADDGANCRKNACCPGSTCVYGNCKSCNPRKCKKARDCCDQSSCVYGNCKSCNPRKCKKTRDCCGDSSCVYGNCTSCRARTCKGKNDCCKGYTCSYKKCVKKD	SVIPSPPCADDGANCRKNACCPGSTCVYGNCKSCNPRKCKKARDCCDQSSCVYGNCKSCNPRKCKKTRDCCGDSSCVYGNCTSCRARTCKGKNDCCKGYTCSYKKCVKKD
mCRP-I	a3	MKMSICLVASLLLVFVGASMANDEMMEDNELANHLVKRSVLPSPPCADDGANCRKSSCCPGSTCVYGKCKSCNPRKCKKARDCCDQSSCVYGNCKSCNPRKCKKTRDCCDDSSCVYGNCKSCRARTCKGKKDCCRGYTCSYKKCVKKD	SVLPSPPCADDGANCRKSSCCPGSTCVYGKCKSCNPRKCKKARDCCDQSSCVYGNCKSCNPRKCKKTRDCCDDSSCVYGNCKSCRARTCKGKKDCCRGYTCSYKKCVKKD
mCRP-I	a4	MKISICLVAGLLLVFVGASMANDEMMEHNELANHLVKRSVIPSPPCADDGANCRKSSCCPGSTCVYGNCKSCNPRKCKKARDCCDQSSCVYGNCKSCNPRKCKKTRDCCDDSSCVYGNCKSCRARTCKGKNDCCRGYTCSYKKCIKKD	SVIPSPPCADDGANCRKSSCCPGSTCVYGNCKSCNPRKCKKARDCCDQSSCVYGNCKSCNPRKCKKTRDCCDDSSCVYGNCKSCRARTCKGKNDCCRGYTCSYKKCIKKD
mCRP-I	a5	MKMSICLVASLLLVFVGASMANDEMMEDNELANHLVKRSVIPSPPCVDDGANCRKNACCPGSTCVYGNCKSCNPRKCKKARDCCDQSSCVYGNCKSCNPRKCKKTRDCCGDSSCVYGNCTSCRARTCKGKNDCCKGYTCSYKKCVKKD	SVIPSPPCVDDGANCRKNACCPGSTCVYGNCKSCNPRKCKKARDCCDQSSCVYGNCKSCNPRKCKKTRDCCGDSSCVYGNCTSCRARTCKGKNDCCKGYTCSYKKCVKKD
mCRP-I	a6	MKMSICLVASLLLVFVGASMANDEMMEDNELANHLVKRSVLPSPPCADDGTNCRKSSCCPGSTCVYGKCKSCNPRKCKKARDCCDQSSCVYGNCKSCNPRKCKKTRDCCDDSSCVYGNCKSCRARTCKGKKDCCRGYTCSYKKCVKKD	SVLPSPPCADDGTNCRKSSCCPGSTCVYGKCKSCNPRKCKKARDCCDQSSCVYGNCKSCNPRKCKKTRDCCDDSSCVYGNCKSCRARTCKGKKDCCRGYTCSYKKCVKKD
mCRP-I	b1	MKVSICLVSSLLLVFVGVNMANDEMMEENELAHHLVKRSKPTPPCVNDGQSCRYRKCCSSSTCVYGNCKACNPRKCKKTNDCCDDSSCVYGNCKSCLPRTCKKTRDCCRDSKCVYGTCKSCRGMTCQRKNDCCEGYTCSYKKCVKKD	SKPTPPCVNDGQSCRYRKCCSSSTCVYGNCKACNPRKCKKTNDCCDDSSCVYGNCKSCLPRTCKKTRDCCRDSKCVYGTCKSCRGMTCQRKNDCCEGYTCSYKKCVKKD
mCRP-I	b2	MKVSICLVASLLLVFVGVNMANDEMMEENELAHNLVKRSKPTPPCVNDGQSCRYRKCCSSSTCVYGNCKACNPRKCKKTNDCCDDSSCVYGNCKSCLPRTCKKTRDCCRDSKCVYGNCKSCRGMTCQRKNDCCEGYTCSYKKCIRKD	SKPTPPCVNDGQSCRYRKCCSSSTCVYGNCKACNPRKCKKTNDCCDDSSCVYGNCKSCLPRTCKKTRDCCRDSKCVYGNCKSCRGMTCQRKNDCCEGYTCSYKKCIRKD
mCRP-I	b3	MKVSICLVASLLLVFVGVNMANDEMMEENELAHNLVKRSKPTPPCVNDGQSCRYRKCCSSSTCVYGNCKACNPRKCKKTNDCCDDSSCVYGNCKSCLPRTCKKTRDCCRDSKCVYGNCKSCRGMTCQRKNDCCEGYTCSYKKCVRKD	SKPTPPCVNDGQSCRYRKCCSSSTCVYGNCKACNPRKCKKTNDCCDDSSCVYGNCKSCLPRTCKKTRDCCRDSKCVYGNCKSCRGMTCQRKNDCCEGYTCSYKKCVRKD
mCRP-I	b4	MKVSICLVASLLLVFVGVNMANDEMMEENELAHNLVKRSKPAPPCVNDGQSCRYRKCCSSSTCVYGNCKACNPRKCKKTNDCCDDSSCVYGNCKSCLPRTCKKTRDCCRDSKCVYGNCKSCRGMTCQRKNDCCEGYTCSYKKCVRKD	SKPAPPCVNDGQSCRYRKCCSSSTCVYGNCKACNPRKCKKTNDCCDDSSCVYGNCKSCLPRTCKKTRDCCRDSKCVYGNCKSCRGMTCQRKNDCCEGYTCSYKKCVRKD
mCRP-I	b5	MKVSICLVASLLLVFVGVNMANDEMMEENELAHNLVKRSKPTPPCVNDGQSCRYRKCCSSSTCVYGNCKACNPRKCKKTRDCCDDSSCVYGNCKSCLPRTCKKTRDCCTDSKCVYGNCKSCRGMTCQRKNDCCEGYTCSYKKCVRKD	SKPTPPCVNDGQSCRYRKCCSSSTCVYGNCKACNPRKCKKTRDCCDDSSCVYGNCKSCLPRTCKKTRDCCTDSKCVYGNCKSCRGMTCQRKNDCCEGYTCSYKKCVRKD
mCRP-I	b6	MKVSICLVASLLLVFLGVNMANDEMMEENELAHNLVKRSKPTPPCVNDGQSCRYRKCCSSSTCVYGNCKACNPRKCKKTNDCCDDSSCVYGNCKSCHPRTCKKTRDCCRDSKCVYGNCKSCRGMTCQRKIDCCEGYTCSYKKCVRKD	SKPTPPCVNDGQSCRYRKCCSSSTCVYGNCKACNPRKCKKTNDCCDDSSCVYGNCKSCHPRTCKKTRDCCRDSKCVYGNCKSCRGMTCQRKIDCCEGYTCSYKKCVRKD
mCRP-I	b7	MKVSICLVASLLLVFVGVNMANDEMMEENELAHNLVKRSKPTPPCVNDGQSCRYRKCCSSSTCVYGNCKACNPRKCKQTRDCCDDSSCVYGNCKSCLPRTCKKTRDCCTDSKCVYGNCKSCRGMTCQRKNDCCEGYTCSYKKCVRKD	SKPTPPCVNDGQSCRYRKCCSSSTCVYGNCKACNPRKCKQTRDCCDDSSCVYGNCKSCLPRTCKKTRDCCTDSKCVYGNCKSCRGMTCQRKNDCCEGYTCSYKKCVRKD
mCRP-I	b8	MKVSICLVASLLLVFIGVNMANDEMMEENELAHNLVKRSKPTPPCVNDGASCRYRKCCSSSTCVYGSCKACNPRKCKKTRDCCDESSCVYGNCKSCLPRTCKKTRDCCRDSKCVYGNCKSCRGMTCQRKKDCCEGYTCSYKKCVRKD	SKPTPPCVNDGASCRYRKCCSSSTCVYGSCKACNPRKCKKTRDCCDESSCVYGNCKSCLPRTCKKTRDCCRDSKCVYGNCKSCRGMTCQRKKDCCEGYTCSYKKCVRKD
mCRP-I	b9	MKVSICLVASLLLVFVGVNMANDEMMEENELAHNLVKRSKPTPPCVNDGQSCRYRKCCSSSTCVYGNCKACNPRKCKKTNDCCDDSSCVYGNCKSCLPRTCKKTCDCCRDSKCVYGNCKSCRGMTCQRKIDCCEGYTCSYKKCVRKD	SKPTPPCVNDGQSCRYRKCCSSSTCVYGNCKACNPRKCKKTNDCCDDSSCVYGNCKSCLPRTCKKTCDCCRDSKCVYGNCKSCRGMTCQRKIDCCEGYTCSYKKCVRKD
mCRP-I	b10	MKVSICLVASLLLVFVGVNMANDEMMEENELAHNLVKRSKPTPPCVNDGQSCRYRKCCSSSTCVYGNCKACNPRKCKKTNDCCDDSSCVYGNCKSCLPRTCKKTRDCCRDSKCVYGTCKSCRGMTCQRKKDCCEGYTCSYKKCVKKD	SKPTPPCVNDGQSCRYRKCCSSSTCVYGNCKACNPRKCKKTNDCCDDSSCVYGNCKSCLPRTCKKTRDCCRDSKCVYGTCKSCRGMTCQRKKDCCEGYTCSYKKCVKKD
mCRP-I	b11	MKVSICLVASLLLVFVGVNMANDEMMEENELTHNLVKRSKPTPPCVNDGASCRYRKCCSSSTCVYGSCKACNPRKCKKTRDCCDESSCVYGNCKSCLPRTCKMTRDCCRDSKCVYGNCKSCRGMTCQRKKDCCEGYTCSYKKCVRKD	SKPTPPCVNDGASCRYRKCCSSSTCVYGSCKACNPRKCKKTRDCCDESSCVYGNCKSCLPRTCKMTRDCCRDSKCVYGNCKSCRGMTCQRKKDCCEGYTCSYKKCVRKD
mCRP-I	g1	MKVSICVVASLLLVFIGATMAVEEMMENNELAHKLVKRGIPVTPSTPSQCGNNGDSCRSNKCCIGYSCVYGSCKSCNPRKCKNIRDCCDDSSCISGNCKSCTPRICKKTRDCCNGSSCVYGNCKSCQERTCTRSNDCCGGYTCSYKKCIRSKKE	GIPVTPSTPSQCGNNGDSCRSNKCCIGYSCVYGSCKSCNPRKCKNIRDCCDDSSCISGNCKSCTPRICKKTRDCCNGSSCVYGNCKSCQERTCTRSNDCCGGYTCSYKKCIRSKKE
mCRP-I	g2	MKVSICVVASLLLVFIRATMEDEEMMENNELAHKLVKRGIPVTSPTPSQCGNNGDSCRSNKCCIGYSCVYGSCKSCNPRKCKNTRDCCDDSSCVYGNCKSCTPRTCKKTRDCCNGSSCVYGNCKSCQERTCKRNNDCCGGYTCSYKKCIRSKKE	GIPVTSPTPSQCGNNGDSCRSNKCCIGYSCVYGSCKSCNPRKCKNTRDCCDDSSCVYGNCKSCTPRTCKKTRDCCNGSSCVYGNCKSCQERTCKRNNDCCGGYTCSYKKCIRSKKE
mCRP-I	g3	MKVSICVVASLLLVFIGATMADEEKMENNELAHKLVKRGIPVTPPTPSQCGNNGDSCRSNKCCIGYSCVYGSCKSCNPRKCKNTRDCCDDSSCVYGNCKSCTPRVCKKTRDCCNGSSCVYGNCKSCQERTCTRSNDCCGGYTCSYKKCIRSKKE	GIPVTPPTPSQCGNNGDSCRSNKCCIGYSCVYGSCKSCNPRKCKNTRDCCDDSSCVYGNCKSCTPRVCKKTRDCCNGSSCVYGNCKSCQERTCTRSNDCCGGYTCSYKKCIRSKKE
mCRP-I	g4	MKVSICVVASLLLVFIGATMAVEEMMENNELAHKLVKRGIPVTPPTPSQCGNNGDSCRSNKCCIGYSCVYGSCKSCNPRKCKNTRDCCDDSSCVYGNCKSCTPRICKKTRDCCNGSSCVYGNCKSCQERTCTRSNDCCGGYTCSYKKCIRPKKE	GIPVTPPTPSQCGNNGDSCRSNKCCIGYSCVYGSCKSCNPRKCKNTRDCCDDSSCVYGNCKSCTPRICKKTRDCCNGSSCVYGNCKSCQERTCTRSNDCCGGYTCSYKKCIRPKKE
mCRP-I	g5	MKVSICVVASLLLVCIGATIAEEEVMENNELAHKLVKRGIPLTSPTPLQCGNNGDSCRSNKCCIGNSCVYGYCKSCNQRKCKNTRDCCDDSSCVYGNCKSCIPRTCKKTRDCCNGSSCVYGNCKSCQERTCKRSNDCCGGYTCSYKKCIRSKKE	GIPLTSPTPLQCGNNGDSCRSNKCCIGNSCVYGYCKSCNQRKCKNTRDCCDDSSCVYGNCKSCIPRTCKKTRDCCNGSSCVYGNCKSCQERTCKRSNDCCGGYTCSYKKCIRSKKE
mCRP-I	g6	MKVSICVVASLLLVCIGATIAEEEVMENNEMAHKLVKRGIPLTSPTPLQCGNNGDSCRSNKCCIGNSCVYGYCKSCNQRKCKNTRDCCDDSSCVYGNCKSCTPRTCKKTRDCCNGSSCVYGNCKSCQERTCKRSNDCCGGYTCSYKKCIRSKKE	GIPLTSPTPLQCGNNGDSCRSNKCCIGNSCVYGYCKSCNQRKCKNTRDCCDDSSCVYGNCKSCTPRTCKKTRDCCNGSSCVYGNCKSCQERTCKRSNDCCGGYTCSYKKCIRSKKE
mCRP-I	d1	MKLTTYLVAVLLLVFVEANMANEEMMSDDGLVHKLVKRGLPLPPGLKKWCKNEGENCWDFRCCSGLNCVDLTCKSCNQRKCKNTRDCCNDSSCIYGNCKPCNPRTCKINRDCCNESSCVSGNCKSCKQRTCKRSNDCCKGYNCSYKKCVQSKKD	GLPLPPGLKKWCKNEGENCWDFRCCSGLNCVDLTCKSCNQRKCKNTRDCCNDSSCIYGNCKPCNPRTCKINRDCCNESSCVSGNCKSCKQRTCKRSNDCCKGYNCSYKKCVQSKKD
mCRP-I	d2	MKLTTYLVACLLLVFVEANMANEEMMSDNGLVHKLVKRGLPLPPGLKKWCKNEEENCWDFRCCSGLSCVDLTCKSCNQRKCKNTRDCCNDSSCIYGNCKPCNPRTCKINRDCCIDSSCVSGNCKSCNQRTCKRSNDCCKGYNCSYKKCVQSKKD	GLPLPPGLKKWCKNEEENCWDFRCCSGLSCVDLTCKSCNQRKCKNTRDCCNDSSCIYGNCKPCNPRTCKINRDCCIDSSCVSGNCKSCNQRTCKRSNDCCKGYNCSYKKCVQSKKD
mCRP-I	d3	MKLTTYLVACLLLVFVEANMANEETMSDDGLVHKLVKRGLPLPPGLKKWCKNEGENCWDFRCCSGLSCVDLTCKSCNQRKCKNTRDCCNDSSCIYENCKPCNPRTCKINSDCCNDSSCVSGNCKSCKQRTCKRSNDCCKGYNCSYKKCVQSKKN	GLPLPPGLKKWCKNEGENCWDFRCCSGLSCVDLTCKSCNQRKCKNTRDCCNDSSCIYENCKPCNPRTCKINSDCCNDSSCVSGNCKSCKQRTCKRSNDCCKGYNCSYKKCVQSKKN
mCRP-I	d4	MKLTTYLVACLLLVFVEANMAKEETMSNDGLVHKLVKRGLPLPPGLKKWCKNEGENCWDFRCCSGLSCVDLTCKSCNQLKCKNTRDCCNDSSCIYGNCKPCNPRTCKINRDCCIDSSCVSGNCKSCKQRTCKRSNDCCKGYNCSHKKCLQSKND	GLPLPPGLKKWCKNEGENCWDFRCCSGLSCVDLTCKSCNQLKCKNTRDCCNDSSCIYGNCKPCNPRTCKINRDCCIDSSCVSGNCKSCKQRTCKRSNDCCKGYNCSHKKCLQSKND
mCRP-I	d5	MKLTTFLVACLLLVFVEANMTNEEMMSDDGLVHKLVKRGLPLPPGLKKWCKNEGENCWDFRCCSGLSCVDLTCKSCNQRKCKNTRDCCNDSSCIDGNCKPCNPRTCKINRDCCDDSSCVSGNCKSCKQRTCKRSNDCCKGYNCSYKKCVQSKKN	GLPLPPGLKKWCKNEGENCWDFRCCSGLSCVDLTCKSCNQRKCKNTRDCCNDSSCIDGNCKPCNPRTCKINRDCCDDSSCVSGNCKSCKQRTCKRSNDCCKGYNCSYKKCVQSKKN
mCRP-I	d6	MKLTTYLVACLLLVFVEANMANEEMMSDDGLVHKLVKRGLPLPPGLKKWCKNEEENCWDFRCCSGLSCVDLTCKSCNQRKCKNTRDCCNDSSCIYGNCKPCNPRTCKINRDCCIGSSCVSGNCKSCNQRTCKRSNDCCKGYNCSYKKCVQSKKD	GLPLPPGLKKWCKNEEENCWDFRCCSGLSCVDLTCKSCNQRKCKNTRDCCNDSSCIYGNCKPCNPRTCKINRDCCIGSSCVSGNCKSCNQRTCKRSNDCCKGYNCSYKKCVQSKKD
mCRP-I	e1	MKVTVCLVACLLLVFVEVSMANDEMVEENELTHNLVKRAAPCGSNGDNCQYKKCCNNFNCVKGRCRPQSCNRSCKNNRQCCNNWGCIYGSCKQCRGRTCKGNNDCCNGYKCAYKRCQKK	AAPCGSNGDNCQYKKCCNNFNCVKGRCRPQSCNRSCKNNRQCCNNWGCIYGSCKQCRGRTCKGNNDCCNGYKCAYKRCQKK
mCRP-I	e2	MKVTVCLVACLLLVFIGVNMATDEMVEDNELTHNLVKRAAPCGSNGDNCQYKKCCNNFNCVKGRCKPKSCKRSCRNSRQCCNNWGCIYGSCQQCRGRTCKGNNDCCNGYKCAYKRCQKK	AAPCGSNGDNCQYKKCCNNFNCVKGRCKPKSCKRSCRNSRQCCNNWGCIYGSCQQCRGRTCKGNNDCCNGYKCAYKRCQKK
mCRP-I	e3	MKVTVCLVACLLLVFIEVNMANDEMVEENELTHNLVKRAASCGSNGDNCQYKKCCNNFNCVKGRCRPQICNRSCRNNRQCCNNWGCIYGSCKQCRGRTCKGNNDCCNGYKCAYKRCQKK	AASCGSNGDNCQYKKCCNNFNCVKGRCRPQICNRSCRNNRQCCNNWGCIYGSCKQCRGRTCKGNNDCCNGYKCAYKRCQKK
mCRP-I	e4	MKVTVCLVACLLLVFIEVNMANDEMVEENELTHNLVKRAAPCGSNGDNCQYKKCCNNFNCVKGRCRPQICNRSCRNNRQCCNNWGCIYGSCKQCRGRTCKGNNDCCNGYKCAYKRCQKK	AAPCGSNGDNCQYKKCCNNFNCVKGRCRPQICNRSCRNNRQCCNNWGCIYGSCKQCRGRTCKGNNDCCNGYKCAYKRCQKK
mCRP-I	e5	MKVTVCLVACLLLVFIEVTIANDEMVEENELTHNLVKRAAPCGSNADNCQYTKCCSNFNCVKGRCRPQSCKRSCKNNRQCCTNWGCIYGSCKQCRGRTCKGNNDCCNGYKCAYKRCQKK	AAPCGSNADNCQYTKCCSNFNCVKGRCRPQSCKRSCKNNRQCCTNWGCIYGSCKQCRGRTCKGNNDCCNGYKCAYKRCQKK
mCRP-I	h1	MKISICSVILVVLVSIGANKANDGMIKDSMHIHTLVKRAPACGYASCSYLACCYGYSCISGFCKTCTGRNCTSNNDCCDNYTCSYKKCIKKRTGGGGVPPKSNTHQH	APACGYASCSYLACCYGYSCISGFCKTCTGRNCTSNNDCCDNYTCSYKKCIKKRTGGGGVPPKSNTHQH*
mCRP-I	h2	MKIAMCSVLLVVFVSFGANKANDGMIKDSMHIHKLMKRAPACGYASCSYLACCYSYSCISGFCKTCTGRNCTSNNDCCDNYTCSYKKCIKKRTGGGGVPPKSNTHQH	APACGYASCSYLACCYSYSCISGFCKTCTGRNCTSNNDCCDNYTCSYKKCIKKRTGGGGVPPKSNTHQH
mCRP-I	h3	MKISICSVILVVLVSIGANKANDGMIKDSMHIHTLVKRAPACGYASCSYLACCYGYSCISGFCKTCTGRNCTSNNDCCDNYTCSYKKCIKKRTGGGGGGVPPKSNTHQH	APACGYASCSYLACCYGYSCISGFCKTCTGRNCTSNNDCCDNYTCSYKKCIKKRTGGGGGGVPPKSNTHQH
mCRP-I	h4	MKISICSVLLLVFVSIGANKANDEMVKDSMHIHTLVKRAPACGYASCSYLACCYGYSCIAGFCKTCTGRNCTSNNDCCDNYTCSYKKCIKKRTGGGGLPPKSNTHHH	APACGYASCSYLACCYGYSCIAGFCKTCTGRNCTSNNDCCDNYTCSYKKCIKKRTGGGGLPPKSNTHHH
mCRP-I	h5	MKISIYSVLLVVFVSIGANKANDEMIKDSMHIHTLVKRAPACGYVSCSYLPCCYGYSCIAGFCKTCTGRNCTSNNDCCDNYTCSYKKCIKKRTGGGGLPPKSNTHHHL	APACGYVSCSYLPCCYGYSCIAGFCKTCTGRNCTSNNDCCDNYTCSYKKCIKKRTGGGGLPPKSNTHHH
mCRP-I	q1	MKISIGLVLCVLMVYIEVNMANTEIQKDSGHIQKLIKRAPACAYKICKYRRCCYGYTCVYGFCKMCAGRDCRSKKDCCNGYTCSYKKCIKRSGGGGRPPHTGKPIFAAV	APACAYKICKYRRCCYGYTCVYGFCKMCAGRDCRSKKDCCNGYTCSYKKCIKRSGGGGRPPHTGKPIFAAV
mCRP-I	q2	MKVSICLVLCVLMVYIEVNMANTDIQKDSGHIQKLIKRAPACAYKICKYRRCCYGYTCVYGFCKTCAGRDCKSKNDCCNGYTCSYKKCIKRNVGGGRRPPHTGIPIFVAV	APACAYKICKYRRCCYGYTCVYGFCKTCAGRDCKSKNDCCNGYTCSYKKCIKRNVGGGRRPPHTGIPIFVAV
mCRP-I	q3	MKISIGLVLYVLMVYIEVNMASTEIQEDSGHIQKLIKRAPACAYKICKYRRCCYGYTCVYGFCKMCAGRYCRSKKDCCNGYTCSYKKCIKRSGGGRRPPHTGKPIFAAV	APACAYKICKYRRCCYGYTCVYGFCKMCAGRYCRSKKDCCNGYTCSYKKCIKRSGGGRRPPHTGKPIFAAV
mCRP-I	q4	MKISIGLVLCVLMVYIEVNIASTEIQKNSEYIQKLIKRAPACAYKICKYRRCCYGYTCVYGFCKMCAGRDCRFKKDCCNGYTCSYKKCIKRSGGGGRPPHTGKPIFAAV	APACAYKICKYRRCCYGYTCVYGFCKMCAGRDCRFKKDCCNGYTCSYKKCIKRSGGGGRPPHTGKPIFAAV
mCRP-I	q5	MKVSICLVLCVLMVYIEVNMANTDIQKDSGHIQKLIKRALACAYKICKYRRCCYGYTCVYGFCKTCAGRDCKSKNDCCNGYTCSYKKCINRNVGGGRRPPHTGIPIFATV	ALACAYKICKYRRCCYGYTCVYGFCKTCAGRDCKSKNDCCNGYTCSYKKCINRNVGGGRRPPHTGIPIFATV
mCRP-I	i1	MKLTTYLVAVLLLVFVEANMANEEMMSDDGLVHKLVKRGLPLPPGLKKWCKNEGENCWDFRCCSGLNCVDLTCKSCNQRKCKNTRDCCNDSSCIYGNCKPCNPRTCKRSNDCCKGYNCSYKKCVQSKKD	GLPLPPGLKKWCKNEGENCWDFRCCSGLNCVDLTCKSCNQRKCKNTRDCCNDSSCIYGNCKPCNPRTCKRSNDCCKGYNCSYKKCVQSKKD
mCRP-I	k1	MQVSFCLVVCLVLMSVEVNQANEITPEGYGLSQNLMKRAVPCGVEFCTSNKPCCNGNACRGGRCNNCAGQICKNTRECCLDHVCSYKICMRRKTNGGPTHPV	AVPCGVEFCTSNKPCCNGNACRGGRCNNCAGQICKNTRECCLDHVCSYKICMRRKTNGGPTHPV
mCRP-I	k2	MQVPFRVVVCILVMSVEVNQANEIMLKYSGLSKTLMKRAVICGTEFCTSYKPCCNGNACLGGRCNNCAGNSCKITRDCCLHHVCSYRICMRRRKTNGGLTHPV	AVICGTEFCTSYKPCCNGNACLGGRCNNCAGNSCKITRDCCLHHVCSYRICMRRRKTNGGLTHPV
mCRP-I	k3	MQVSFCLIVCLMLMSVEVSQANEITPEGYGLSQNLMKRAVPCGVEFCTSYKPCCNGNACRGGRCNSCAGQICKNTRECCLDHVCSYKICMRRKTNGGPTHPV	AVPCGVEFCTSYKPCCNGNACRGGRCNSCAGQICKNTRECCLDHVCSYKICMRRKTNGGPTHPV
mCRP-I	k4	MQVSLCLVVCLLLMSVKVNQANEIIPKGYGLSHNLMKRAVPCGVEFCTSYKPCCNGNACLGGRCNNCAGHSCKNTRECCLDHVCSYKICMRRKTNGGPTHPV	AVPCGVEFCTSYKPCCNGNACLGGRCNNCAGHSCKNTRECCLDHVCSYKICMRRKTNGGPTHPV
mCRP-I	k5	MQVPFRVVVCILVMSVEVNQANEIMLKYSGLSKTLMKRAVICGTEFCTSYKPCCNGNACLGGRCNNCAGNSCKITRDCCLHHVCSYRICMLRRKTNGGLTHPV	AVICGTEFCTSYKPCCNGNACLGGRCNNCAGNSCKITRDCCLHHVCSYRICMLRRKTNGGLTHPV
mCRP-I	l1	MKVSVCLIACLLFVAVEANKVTGSVQRENRLIRILTKRGVPLFPTHIPPMPSLPTPILPTLPVPTTAATM	GVPLFPTHIPPMPSLPTPILPTLPVPTTAATM
mCRP-I	l2	MKFSVCLITCLLFVSVEANKVAESVQRETGFIRILTKRGVPLFPTHIPPMPSLPTPILPTLPVPTTAATI	GVPLFPTHIPPMPSLPTPILPTLPVPTTAATI
mCRP-I	l3	MKVSVCLIACLLFVAVEANKVTGSVQRENRLIRILTKRGVLLFPTHIPPMPSLPTPILPTLPVPTTAATM	GVLLFPTHIPPMPSLPTPILPTLPVPTTAATM
mCRP-I	l4	MKVSVCLIACLLFVAVEANKVTGSVQRENGLIRILTKRGVPLFPTHIPPTPSLPTPILPTLPVPTTAATI	GVPLFPTHIPPTPSLPTPILPTLPVPTTAATI
mCRP-I	m1	MKVAICLFASLLIVVVGVSMADEEMVDDNELTHKLVKRRSVKPCGFNGANCKNSPCCPGNTCVYGICKSCNSRKCKTTRDCCNDSSCIYGNCKSCNPRKCKNTRDCCDDSSCVYGNCTSCKARTCKRSNDCCKGYNCSYKKCVRSTKKD	SVKPCGFNGANCKNSPCCPGNTCVYGICKSCNSRKCKTTRDCCNDSSCIYGNCKSCNPRKCKNTRDCCDDSSCVYGNCTSCKARTCKRSNDCCKGYNCSYKKCVRSTKKD
mCRP-I	m2	MKIAICLFASLLIAFVGVSMANEELAEDNELAHKLVKRRSVIPCGFNGANCKNSPCCPGNTCVYGICKSCNSRKCKTTRDCCNDSSCIYGNCKSCNPRKCKNTRDCCDDSSCVYGNCTSCTARTCKGSNDCCKGYNCSYKKCVRSTKKD	SVIPCGFNGANCKNSPCCPGNTCVYGICKSCNSRKCKTTRDCCNDSSCIYGNCKSCNPRKCKNTRDCCDDSSCVYGNCTSCTARTCKGSNDCCKGYNCSYKKCVRSTKKD
mCRP-I	m3	MKIAICLFASLLIAFVGVSMANEELAEDNELAHKLVKRRSVIPCGFNGANCNKSPCCPGNTCIYGVCKSCNSRKCKTTRDCCNDSSCIYGNCKSCNPRKCKNTRDCCDDSSCVYGNCTSCTARTCKQSNDCCKGYNCSYKKCVRSIKKD	SVIPCGFNGANCNKSPCCPGNTCIYGVCKSCNSRKCKTTRDCCNDSSCIYGNCKSCNPRKCKNTRDCCDDSSCVYGNCTSCTARTCKQSNDCCKGYNCSYKKCVRSIKKD
mCRP-I	m4	MKIAICLFASLLIAFVGVSMANEELAEDNELAHKLVKRRSVIPCGFNGANCKNSPCCPGNTCVYGICKTCNSRKCKTTRDCCNDSSCIYGNCKSCNPRKCKNTRDCCDDSSCVYGNCTSCTARTCKRSNDCCKGYNCSYKKCVRSTKKD	SVIPCGFNGANCKNSPCCPGNTCVYGICKTCNSRKCKTTRDCCNDSSCIYGNCKSCNPRKCKNTRDCCDDSSCVYGNCTSCTARTCKRSNDCCKGYNCSYKKCVRSTKKD
mCRP-I	n1	MKMSICLVASLLLVFVGASMANDEMMEDNELANHLVKRSVVPPPCGDDGARCKNSPCCPGSTCVYGSCKSCNPRKCKKTRDCCDQSSCVYGNCKSCNPRKCKKTRDCCDQSSCVYGNCKSCTPRTCKNTRDCCADSSCVYGNCKSCRGLTCKGKKDCCRGYTCSSKKCVKKD	SVVPPPCGDDGARCKNSPCCPGSTCVYGSCKSCNPRKCKKTRDCCDQSSCVYGNCKSCNPRKCKKTRDCCDQSSCVYGNCKSCTPRTCKNTRDCCADSSCVYGNCKSCRGLTCKGKKDCCRGYTCSSKKCVKKD
mCRP-I	n2	MKMSICLVASLLLVFVGASMANDEMMEDNELANHLVKRSVVPPPCGDDGARCKNSPCCPGSTCVYGSCKSCNPRKCKKTRDCCDQSSCVYGNCKSCNPRKCKKTRDCCDQSSCVYGNCKSCTPRTCKNTRDCCVDSSCVYGNCKSCRGLTCKGKKDCCRGYTCSSKKCVKKD	SVVPPPCGDDGARCKNSPCCPGSTCVYGSCKSCNPRKCKKTRDCCDQSSCVYGNCKSCNPRKCKKTRDCCDQSSCVYGNCKSCTPRTCKNTRDCCVDSSCVYGNCKSCRGLTCKGKKDCCRGYTCSSKKCVKKD
mCRP-I	n3	MKMSICLVASLLLVFVGASMANDEMMEDNELANHLVKRSVVPPPCGDDGARCKNSPCCPGSTCVYGSCKSCNPRKCKKARNCCDQSSCVYGNCKSCNPRKCKKTRDCCDQSSCVYGNCKSCTPRTCKNTRDCCADSSCVYGNCKSCRGLTCKGKKDCCRGYTCSSKKCVKKD	SVVPPPCGDDGARCKNSPCCPGSTCVYGSCKSCNPRKCKKARNCCDQSSCVYGNCKSCNPRKCKKTRDCCDQSSCVYGNCKSCTPRTCKNTRDCCADSSCVYGNCKSCRGLTCKGKKDCCRGYTCSSKKCVKKD
mCRP-I	n4	MKMSICLVASLLLVFVGASMANDEMMEDNELANHLVKRSVVPPPCGDDGARCKNSPCCPGSTCVYGSCKSCNPRKCKKARDCCDQSSCVYGNCKSCNPRKCKKTRDCCDQSSCVYGNCKSCTPRTCKNTRDCCADSSCVYGNCKSCRGITCKGKKDCCRGYTCSSKKCVKKD	SVVPPPCGDDGARCKNSPCCPGSTCVYGSCKSCNPRKCKKARDCCDQSSCVYGNCKSCNPRKCKKTRDCCDQSSCVYGNCKSCTPRTCKNTRDCCADSSCVYGNCKSCRGITCKGKKDCCRGYTCSSKKCVKKD
mCRP-I	n5	MKMSICLVASLLLVFVGASMANDEMMEDNELANHLVKRSVVPPPCGDDGARCKNSPCCPGSTCVYGSCKSCNLRKCKKARDCCDQSSCVYGNCKSCNPRKCKKTRDCCDQSSCVYGNCKSCTPRTCKNTRDCCADSSCVYGNCKSCRGLTCKGKKDCCRGYTCSSKKCVKKD	SVVPPPCGDDGARCKNSPCCPGSTCVYGSCKSCNLRKCKKARDCCDQSSCVYGNCKSCNPRKCKKTRDCCDQSSCVYGNCKSCTPRTCKNTRDCCADSSCVYGNCKSCRGLTCKGKKDCCRGYTCSSKKCVKKD
mCRP-I	z1	MYVSICLVSCLFLMFMGANMANEEIMQNKELIHDRLKRAAPCGNYHDKCQHNRPCCKSYHCVKGTCLPLCYAQPCKQFVDCCRNHTCRKGFCFP	AAPCGNYHDKCQHNRPCCKSYHCVKGTCLPLCYAQPCKQFVDCCRNHTCRKGFCFP
mCRP-I	z2	MYVSICLVSCLLLMFVGANMGNKEIMQDKELIHNRLKRAAPCGNYHDKCQHDRPCCKSYHCVKGTCLPLCYAQPCKQFMDCCRSHTCRKGFCIPRNCIEGLC	AAPCGNYHDKCQHDRPCCKSYHCVKGTCLPLCYAQPCKQFMDCCRSHTCRKGFCIPRNCIEGLC
mCRP-I	z3	MHVSICLVSCLLLMFVGANMGNEEIMQFKELIHDRLKRAAPCGNYHDKCQHDRPCCKSYHCVKGTCLPLCYAQPCKQFMDCCRNHTCRKGFCIPRNCIEGLC	AAPCGNYHDKCQHDRPCCKSYHCVKGTCLPLCYAQPCKQFMDCCRNHTCRKGFCIP
mCRP-I	x1	MKISICLVLLVVLVSVGANKAHDEMIKDSMYIHTLVKRAPVCGYTSCPHVPCCNGYSCISGLCKICVGRDCNSKNDCCNGFTCSYNKCRSGSAGGGIRPGIDSKIQHH	APVCGYTSCPHVPCCNGYSCISGLCKICVGRDCNSKNDCCNGFTCSYNKCRSGSAGGGIRPGIDSKIQHH
mCRP-I	x2	MKISICLVLLVVLVSVGANKANDEMTKDSMYIHTLVKRAPVCGYTSCPHIPCCNGYSCISGLCKICVGRDCNSKNDCCNGFTCSYNKCRSGSAGGGIRPGIDSKIQHH	APVCGYTSCPHIPCCNGYSCISGLCKICVGRDCNSKNDCCNGFTCSYNKCRSGSAGGGIRPGIDSKIQHH
mCRP-I	x3	MKISICLVLLLVLVSVGANKANDKMIKDSIHMHTLVKRAPACVYTSCLKLSCCYGYSCVSGFCKMCTGRDCNSTNDCCNGYTCSYKKCRSGSAGGGGTVPGTESKIQHH	APACVYTSCLKLSCCYGYSCVSGFCKMCTGRDCNSTNDCCNGYTCSYKKCRSGSAGGGGTVPGTESKIQH
mCRP-I	o1	MNISMCLFLCMVLVSIGVNMANEEIQKDSGHIKKLIKRVPACAYKICRIRRCCNGYICTNGFCKMCAERYCKSKTDCCKGYTCSYKKCIKRNGGGFAVWNDDVE	VPACAYKICRIRRCCNGYICTNGFCKMCAERYCKSKTDCCKGYTCSYKKCIKRNGGGFAVWNDDVE
mCRP-I	o2	MNISMCLVLCMLLVSIGVNMANEEIQKDSGHIKKLIKRAPACTYKICRIRRCCNGYICTNGFCKMCAGRNCKSKTDCCKGYTCSYKKCIKRTRGGFAVWNDDVE	APACTYKICRIRRCCNGYICTNGFCKMCAGRNCKSKTDCCKGYTCSYKKCIKRTRGGFAVWNDDVE
mCRP-I	o3	MNISMCLVLCMLLVSIGVNMANEEIQKDSGHIKKLIKRAPACTYKICRICRCCNGYICTNGFCKMCAGRNCKSKTDCCKGYTCSYKKCIKRNRGGFAVWNDDAE	APACTYKICRICRCCNGYICTNGFCKMCAGRNCKSKTDCCKGYTCSYKKCIKRNRGGFAVWNDDAE
mCRP-I	o4	MIISMCLDLCMLLVSVGVNMANEERQKDSGHIKKLIKRAPPCAYKICRIRRCCNGYICTNGFCKMCAGRDCKSKTDCCKGYTCSYKKCIKRNGGGFAVWNDDVE	APPCAYKICRIRRCCNGYICTNGFCKMCAGRDCKSKTDCCKGYTCSYKKCIKRNGGGFAVWNDDVE
mCRP-I	o5	MNISMCLVLCMLLVSIGVNMANEEIQKDSGHIKKLIKRAPACTYKICRIRRCCNGYICTNGFCKMCAGRNCKSKTDCCKGYTCSYKKCIKRNRGGFAVWNDDVE	APACTYKICRIRRCCNGYICTNGFCKMCAGRNCKSKTDCCKGYTCSYKKCIKRNRGGFAVWNDDVE
mCRP-I	o6	MNISMCLVLCMLLVFVGVNMANEETQKDSGHIKKLIKRAPACAYKICRIRRCCNEYICTNGFCKMCAGRDCKSKTDCCKGYTCSYKKCIKRTRGGFAVWNDDVE	APACAYKICRIRRCCNEYICTNGFCKMCAGRDCKSKTDCCKGYTCSYKKCIKRTRGGFAVWNDDVE
mCRP-I	o7	MNISMCLVLCILLVFVGVNMANEETQKDSGHIKKLIKRAPACAYKICRIRRCCNGYICTNGFCKMCAGRDCKSKTDCCKGYTCSYKKCIKRNRGGFAVWNDDVE	APACAYKICRIRRCCNGYICTNGFCKMCAGRDCKSKTDCCKGYTCSYKKCIKRNRGGFAVWNDDVE
mCRP-I	p1	MKVSIGLVASLLLMFVGANMAKEVMMEENELAHKLVKRGIQLSSPTPPQCGNNGDSCLSNKCCIGYSCVYGSCKSCNPRKCKKTRDCCDDSSCVSGNCKSCLPRKCKKTRDCCYGSSCVIGNCKSCQERTCKRRNDCCGGYTCSYKKCVRSKKE	GIQLSSPTPPQCGNNGDSCLSNKCCIGYSCVYGSCKSCNPRKCKKTRDCCDDSSCVSGNCKSCLPRKCKKTRDCCYGSSCVIGNCKSCQERTCKRRNDCCGGYTCSYKKCVRSKKE
mCRP-I	p2	MKVSIGLVASLLLMFVGANMAKEVMMEENELAHKLVKRGIQLSSPTPPQCGNNGDSCLSNKCCIGYSCVYGSCKSCNPRKCKKTRDCCDDSSCVSGNCKSCLPRKCKKTRDCCYGSSCVIGNCKSCQERTCKRSNDCCGGYTCSYKKCVRSKKE	GIQLSSPTPPQCGNNGDSCLSNKCCIGYSCVYGSCKSCNPRKCKKTRDCCDDSSCVSGNCKSCLPRKCKKTRDCCYGSSCVIGNCKSCQERTCKRSNDCCGGYTCSYKKCVRSKKE
mCRP-I	p3	MKVSIGLVASLLLMFVGANMAKEVMMEENELAHKLVKRGIQLSSPTPPQCGNNGDSCLSNKCCIGYSCVYGSCKSCNPRKCKKTRDCCDDSSCVSGNCKSCLPRKCKKTRDCCYGSSCVIGNCKSCQERTCKRSKDCCGGYTCSYKKCVRSKKE	GIQLSSPTPPQCGNNGDSCLSNKCCIGYSCVYGSCKSCNPRKCKKTRDCCDDSSCVSGNCKSCLPRKCKKTRDCCYGSSCVIGNCKSCQERTCKRSKDCCGGYTCSYKKCVRSKKE
mCRP-I	p4	MKVSIGLVASLLLMFVGANMAKEVMMEENELAHKLVKRGIQLSSPTPPQCGNNGDSCLSNKCCIGYSCVYGSCKSCNPRKCKKTRDCCDDSSCVSGNCKSCLPRKCKKTRDCCYGSSCVIGNCKSCQERTCKRSNDCCRGYTCSYKKCVRSKKE	GIQLSSPTPPQCGNNGDSCLSNKCCIGYSCVYGSCKSCNPRKCKKTRDCCDDSSCVSGNCKSCLPRKCKKTRDCCYGSSCVIGNCKSCQERTCKRSNDCCRGYTCSYKKCVRSKKE
mCRP-I	p5	MKVSIGLVASLLLMFVGANMAKEVMMEENELAHKLVKRGIPLSSPTPPQCGNNGDSCLSNKCCIGYSCVYGSCKSCNPRKCKKTRDCCDDSSCVSGNCKSCLPRKCKKTRDCCYGSSCVYGNCKSCQERTCKRSNDCCGGYTCSYKKCVRSKKE	GIPLSSPTPPQCGNNGDSCLSNKCCIGYSCVYGSCKSCNPRKCKKTRDCCDDSSCVSGNCKSCLPRKCKKTRDCCYGSSCVYGNCKSCQERTCKRSNDCCGGYTCSYKKCVRSKKE

## Sheet: Table S4
Presence/absence patterns of sCRP-I and mCRP-I sequences obsered in 23 resequenced Mytilus genomes
	LOLA	PURA	GALF1	GALF2	GALF3	GALM1	GALM2	GALM3	GALM6	GALM11	ITAF1	ITAF2	ITAF3	ITAM1	ITAM2	ITAM3	MgalMED	MgalAUS	PEIMed	MeduMEDL1	MeduEUN	MeduEUS	Mchil
A1	X	X	NO	X	X	X	X	X	X	X	X	X	X	X	X	X	X	X	X	X	X	X	NO
A2	NO	X	NO	NO	NO	X	NO	NO	NO	NO	NO	NO	NO	NO	NO	NO	NO	X	X	NO	NO	NO	NO
A3	NO	NO	NO	NO	NO	NO	NO	NO	NO	NO	X	NO	NO	NO	NO	NO	NO	NO	NO	NO	NO	NO	NO
A4	NO	NO	NO	NO	X	NO	NO	NO	NO	NO	X	NO	NO	NO	X	NO	X	NO	NO	NO	NO	NO	X
A5	NO	NO	NO	NO	NO	NO	NO	NO	NO	X	NO	NO	NO	NO	NO	NO	NO	NO	NO	NO	NO	NO	NO
A6	NO	NO	NO	NO	NO	NO	NO	NO	NO	NO	NO	NO	NO	NO	NO	NO	NO	NO	NO	NO	X	NO	NO
B1	X	X	X	X	X	X	NO	X	X	NO	X	X	X	X	X	X	X	X	X	X	X	X	NO
B2	NO	NO	NO	NO	NO	NO	NO	NO	NO	NO	NO	NO	NO	NO	NO	NO	NO	X	NO	NO	X	NO	X
B3	NO	X	NO	NO	NO	NO	NO	NO	NO	NO	NO	NO	NO	NO	NO	NO	NO	NO	NO	X	NO	NO	NO
B4	NO	NO	X	NO	NO	NO	NO	NO	NO	X	NO	NO	NO	NO	NO	NO	X	NO	NO	NO	NO	NO	NO
B5	NO	NO	NO	NO	NO	NO	NO	NO	NO	NO	NO	NO	X	X	NO	NO	NO	NO	NO	NO	NO	NO	NO
B6	NO	NO	NO	NO	NO	NO	NO	NO	NO	NO	NO	NO	NO	NO	NO	NO	NO	NO	NO	X	NO	NO	NO
C1	NO	NO	NO	NO	NO	NO	X	NO	NO	NO	X	X	NO	X	X	NO	NO	NO	NO	NO	NO	NO	NO
C2	NO	NO	NO	NO	NO	NO	NO	NO	NO	NO	NO	NO	NO	NO	NO	NO	NO	NO	NO	NO	NO	NO	NO
C3	NO	NO	X	NO	X	NO	NO	NO	NO	NO	NO	NO	NO	NO	NO	NO	X	X	X	X	NO	X	X
C4	X	X	NO	NO	X	X	NO	NO	NO	NO	NO	NO	X	NO	NO	X	NO	NO	NO	NO	NO	NO	NO
C5	NO	NO	NO	NO	NO	NO	NO	NO	X	NO	NO	NO	NO	NO	NO	NO	NO	NO	NO	NO	NO	NO	NO
C6	NO	NO	NO	NO	NO	NO	NO	NO	NO	NO	NO	X	NO	NO	NO	NO	NO	NO	NO	NO	NO	NO	NO
C7	NO	NO	NO	NO	NO	NO	NO	NO	NO	NO	NO	NO	NO	NO	NO	NO	NO	NO	NO	NO	X	NO	NO
D1	X	X	NO	NO	X	NO	NO	NO	NO	X	X	NO	NO	NO	NO	NO	X	NO	NO	NO	NO	NO	NO
D2	NO	NO	NO	NO	NO	NO	NO	NO	NO	NO	NO	NO	NO	NO	NO	NO	NO	X	NO	NO	NO	NO	X
D3	NO	NO	NO	NO	NO	NO	NO	NO	X	NO	NO	NO	NO	NO	NO	NO	NO	NO	NO	NO	NO	NO	NO
D4	NO	NO	NO	NO	NO	NO	NO	NO	NO	NO	NO	X	NO	NO	NO	NO	NO	NO	NO	NO	NO	NO	NO
E1	NO	NO	X	NO	NO	NO	NO	NO	X	NO	NO	NO	NO	X	X	NO	NO	NO	NO	NO	NO	NO	X
F1	X	NO	X	X	X	X	X	NO	X	X	X	X	X	X	X	X	X	X	X	X	X	X	NO
F2	NO	X	NO	NO	NO	NO	NO	NO	NO	NO	NO	NO	X	NO	NO	NO	NO	NO	NO	NO	X	NO	NO
F3	NO	NO	NO	NO	NO	NO	NO	X	NO	NO	NO	NO	NO	NO	NO	NO	NO	NO	NO	NO	NO	NO	NO
F4	NO	NO	NO	NO	NO	NO	NO	NO	NO	NO	X	NO	NO	NO	NO	NO	NO	NO	NO	NO	NO	NO	NO
G1	X	X	X	X	X	NO	X	X	X	X	X	X	X	X	X	X	X	X	NO	X	NO	X	NO
G2	NO	NO	NO	NO	NO	NO	NO	NO	NO	NO	NO	NO	NO	NO	NO	NO	NO	NO	NO	NO	NO	NO	NO
G3	NO	NO	NO	NO	NO	X	NO	NO	NO	NO	NO	NO	NO	NO	NO	NO	NO	NO	X	NO	X	NO	NO
G4	NO	NO	NO	NO	NO	NO	NO	NO	NO	NO	NO	NO	NO	NO	NO	NO	NO	NO	NO	NO	X	NO	NO
G5	NO	NO	NO	NO	NO	NO	NO	NO	NO	NO	NO	NO	NO	NO	NO	NO	NO	NO	NO	NO	NO	NO	X
H1	NO	X	NO	X	NO	X	X	X	NO	NO	X	NO	X	X	X	X	NO	X	X	NO	NO	NO	NO
H10	NO	NO	NO	NO	NO	NO	NO	NO	NO	NO	NO	NO	NO	NO	NO	NO	NO	NO	NO	X	X	NO	NO
H11	NO	NO	NO	NO	NO	NO	NO	NO	NO	NO	NO	NO	NO	NO	NO	NO	NO	NO	NO	NO	NO	NO	X
H2	X	X	X	X	X	X	X	X	X	X	NO	X	NO	X	X	X	X	X	X	X	X	X	X
H3	X	NO	NO	NO	NO	NO	NO	NO	NO	NO	NO	NO	NO	NO	NO	NO	NO	NO	NO	NO	NO	NO	NO
H4	NO	NO	X	X	X	NO	NO	NO	NO	X	NO	X	NO	X	NO	NO	NO	NO	NO	NO	NO	NO	NO
H5	NO	NO	NO	NO	NO	NO	NO	NO	NO	NO	NO	NO	NO	NO	NO	NO	NO	X	NO	NO	NO	NO	NO
H6	NO	NO	NO	NO	NO	NO	NO	NO	NO	NO	NO	NO	X	X	X	X	NO	NO	NO	NO	NO	X	NO
H7	NO	NO	NO	NO	NO	X	NO	NO	NO	NO	NO	NO	NO	NO	NO	NO	X	NO	NO	NO	NO	NO	NO
H8	NO	NO	NO	NO	NO	NO	NO	NO	NO	NO	NO	NO	NO	NO	NO	NO	NO	NO	X	NO	X	NO	NO
H9	NO	NO	NO	NO	NO	NO	NO	NO	NO	NO	NO	NO	NO	NO	NO	NO	NO	NO	NO	X	NO	NO	NO
I1	X	X	X	X	X	X	X	X	X	X	X	X	X	X	X	X	X	X	X	X	X	X	NO
I2	X	NO	NO	X	X	X	NO	NO	NO	NO	NO	NO	NO	NO	NO	NO	NO	NO	NO	NO	NO	NO	NO
J1	X	NO	NO	NO	NO	NO	NO	NO	X	NO	NO	NO	NO	NO	NO	NO	NO	NO	NO	NO	NO	NO	NO
J2	NO	X	NO	NO	NO	NO	NO	NO	NO	NO	NO	NO	NO	NO	NO	NO	NO	NO	NO	NO	NO	NO	NO
J3	X	NO	X	X	X	X	NO	NO	X	X	X	X	NO	NO	X	X	X	X	NO	NO	NO	NO	NO
J4	NO	X	NO	NO	NO	NO	X	NO	NO	NO	NO	NO	NO	NO	NO	NO	NO	NO	NO	NO	NO	X	NO
J5	NO	NO	NO	NO	NO	NO	NO	X	NO	NO	NO	NO	NO	NO	NO	NO	NO	NO	NO	NO	X	NO	NO
J6	NO	NO	NO	NO	NO	NO	NO	NO	NO	NO	NO	NO	X	NO	NO	NO	NO	NO	NO	NO	NO	NO	NO
J7	NO	NO	NO	NO	NO	NO	NO	NO	NO	X	NO	NO	X	X	NO	NO	NO	NO	X	NO	NO	NO	NO
J8	NO	NO	NO	NO	NO	NO	NO	NO	NO	NO	NO	NO	NO	NO	NO	NO	NO	NO	NO	NO	NO	NO	X
K1	NO	NO	NO	NO	NO	NO	NO	NO	NO	NO	NO	X	NO	NO	NO	X	NO	NO	NO	NO	NO	NO	NO
K2	NO	NO	NO	NO	NO	NO	NO	NO	NO	NO	NO	NO	NO	NO	NO	NO	NO	NO	NO	NO	NO	NO	NO
K3	NO	NO	NO	NO	NO	NO	NO	NO	NO	NO	NO	NO	NO	NO	NO	NO	NO	X	X	NO	X	X	NO
K4	NO	NO	X	NO	NO	NO	X	NO	NO	NO	X	NO	NO	X	X	NO	X	X	X	NO	NO	NO	NO
K5	X	NO	X	X	X	NO	X	X	NO	X	NO	NO	NO	NO	NO	NO	NO	NO	NO	NO	NO	NO	NO
K6	X	X	NO	X	X	X	NO	X	X	NO	X	X	X	NO	NO	NO	NO	NO	NO	NO	NO	NO	NO
K7	NO	NO	NO	NO	NO	NO	NO	NO	NO	NO	NO	NO	NO	X	NO	NO	NO	NO	NO	NO	NO	NO	NO
K8	NO	NO	NO	NO	NO	NO	NO	NO	NO	NO	NO	NO	NO	NO	NO	NO	NO	NO	NO	NO	NO	NO	X
L1	X	NO	NO	NO	X	NO	NO	NO	NO	NO	X	X	NO	NO	NO	NO	NO	NO	NO	NO	NO	NO	NO
L2	NO	NO	NO	NO	NO	NO	NO	NO	X	NO	NO	NO	NO	NO	X	NO	NO	NO	NO	NO	NO	NO	NO
L3	NO	X	NO	NO	NO	NO	NO	NO	NO	NO	NO	NO	NO	NO	NO	NO	NO	NO	NO	NO	NO	NO	NO
L4	NO	NO	X	NO	NO	NO	NO	NO	NO	NO	NO	NO	NO	NO	NO	NO	NO	NO	NO	NO	NO	NO	NO
L5	NO	NO	NO	NO	NO	NO	NO	NO	NO	NO	X	NO	NO	NO	NO	NO	NO	NO	NO	NO	NO	NO	NO
L6	NO	NO	NO	NO	NO	NO	NO	NO	NO	NO	NO	NO	NO	NO	NO	NO	NO	NO	NO	NO	NO	NO	X
M1	X	NO	NO	NO	NO	NO	X	NO	NO	NO	NO	NO	X	NO	NO	NO	NO	X	NO	NO	NO	NO	NO
M2	NO	X	NO	NO	NO	NO	NO	NO	NO	NO	NO	NO	NO	NO	NO	NO	NO	NO	NO	NO	NO	NO	NO
M3	X	NO	NO	X	X	NO	NO	NO	NO	NO	NO	X	NO	NO	NO	NO	NO	NO	NO	NO	NO	NO	NO
M4	NO	NO	NO	NO	X	NO	NO	NO	NO	NO	NO	NO	NO	NO	NO	NO	NO	NO	NO	NO	NO	NO	NO
M5	NO	NO	NO	NO	NO	X	X	X	X	NO	NO	NO	NO	NO	NO	NO	NO	NO	X	NO	NO	NO	NO
M6	NO	NO	NO	NO	NO	NO	NO	NO	X	NO	NO	NO	NO	NO	NO	NO	NO	NO	NO	NO	NO	NO	NO
M7	NO	NO	NO	NO	NO	NO	NO	NO	NO	NO	NO	NO	NO	NO	NO	NO	NO	NO	NO	X	NO	NO	NO
M8	NO	NO	NO	NO	NO	NO	NO	NO	NO	NO	NO	NO	NO	NO	NO	NO	NO	NO	NO	NO	X	NO	NO
M9	NO	NO	NO	NO	NO	NO	NO	NO	NO	NO	NO	NO	NO	NO	NO	NO	NO	NO	NO	NO	NO	X	NO
N1	NO	NO	NO	NO	NO	NO	NO	NO	X	NO	NO	NO	NO	NO	NO	NO	NO	NO	NO	NO	NO	NO	NO
N2	NO	NO	NO	NO	NO	NO	NO	NO	NO	NO	NO	NO	NO	NO	NO	NO	NO	NO	NO	NO	X	NO	NO
N3	X	NO	NO	NO	X	X	NO	NO	NO	NO	X	NO	NO	NO	NO	NO	NO	NO	NO	NO	NO	NO	X
N4	X	NO	NO	X	NO	NO	X	X	X	NO	NO	X	NO	NO	NO	NO	NO	NO	NO	NO	NO	NO	NO
N5	NO	NO	NO	NO	NO	NO	X	X	NO	NO	NO	NO	NO	NO	NO	NO	NO	NO	X	NO	NO	NO	NO
N6	NO	NO	NO	NO	NO	NO	NO	NO	NO	NO	NO	NO	NO	NO	NO	X	NO	NO	NO	NO	NO	NO	NO
N7	NO	NO	NO	NO	NO	NO	NO	NO	NO	X	NO	NO	NO	NO	NO	NO	NO	NO	NO	NO	NO	NO	NO
N8	NO	NO	NO	NO	NO	NO	NO	NO	NO	NO	NO	NO	NO	NO	NO	NO	NO	NO	X	NO	NO	NO	NO
N9	NO	NO	NO	NO	NO	NO	NO	NO	NO	NO	NO	NO	NO	NO	NO	NO	NO	NO	NO	NO	NO	NO	X
O1	NO	NO	NO	NO	NO	NO	NO	NO	NO	NO	NO	NO	NO	NO	NO	NO	NO	NO	NO	NO	NO	NO	NO
O2	NO	NO	NO	NO	NO	X	NO	NO	NO	NO	NO	NO	NO	NO	NO	NO	NO	NO	X	NO	X	X	NO
O3	NO	NO	NO	NO	NO	NO	X	NO	NO	NO	NO	NO	NO	NO	NO	NO	NO	NO	NO	NO	NO	NO	NO
P1	NO	NO	NO	NO	X	NO	NO	NO	NO	NO	NO	NO	NO	NO	NO	NO	NO	NO	NO	NO	NO	NO	NO
P10	NO	NO	NO	NO	NO	NO	NO	NO	NO	NO	NO	NO	NO	NO	NO	NO	NO	NO	NO	NO	NO	NO	X
P11	NO	NO	NO	NO	NO	NO	NO	NO	NO	NO	NO	NO	NO	NO	NO	NO	NO	NO	NO	NO	NO	X	NO
P2	X	NO	X	NO	NO	X	X	NO	X	X	NO	X	NO	NO	NO	NO	X	NO	X	NO	NO	X	NO
P3	X	NO	NO	X	NO	X	NO	NO	NO	NO	NO	X	X	NO	NO	NO	NO	NO	NO	NO	NO	NO	NO
P4	NO	X	NO	X	NO	NO	NO	NO	NO	NO	NO	NO	NO	X	NO	NO	NO	NO	NO	NO	NO	NO	NO
P5	NO	NO	NO	NO	X	NO	NO	NO	NO	X	X	NO	NO	NO	NO	NO	NO	NO	NO	NO	NO	NO	X
P6	NO	NO	NO	NO	NO	NO	X	X	NO	NO	NO	NO	NO	NO	NO	NO	NO	NO	NO	NO	X	NO	NO
P7	NO	NO	NO	NO	NO	NO	NO	NO	NO	NO	NO	NO	NO	X	X	NO	NO	NO	NO	NO	NO	NO	NO
P8	NO	NO	NO	NO	NO	NO	NO	NO	NO	NO	NO	NO	NO	NO	NO	NO	NO	NO	NO	X	NO	NO	NO
P9	NO	NO	NO	NO	NO	NO	NO	NO	NO	NO	NO	NO	NO	NO	NO	NO	NO	NO	NO	NO	X	NO	NO
Q1	X	NO	NO	X	NO	NO	NO	NO	X	X	X	X	X	X	X	X	NO	X	NO	NO	X	NO	X
R1	X	NO	NO	NO	NO	NO	NO	NO	NO	NO	NO	NO	NO	NO	NO	NO	NO	NO	NO	NO	NO	NO	NO
S1	X	NO	NO	NO	NO	NO	X	NO	NO	NO	NO	NO	NO	X	X	NO	X	X	NO	X	X	NO	X
S2	X	NO	NO	NO	NO	NO	NO	NO	NO	NO	NO	NO	NO	NO	NO	NO	NO	NO	NO	NO	NO	NO	NO
S3	X	NO	X	NO	NO	NO	NO	NO	X	NO	NO	NO	X	X	NO	NO	NO	NO	NO	NO	NO	NO	NO
S4	NO	NO	X	NO	NO	NO	NO	NO	X	NO	NO	NO	X	X	NO	NO	NO	NO	NO	NO	NO	NO	NO
T1	NO	NO	NO	X	X	NO	NO	NO	NO	X	NO	X	X	NO	X	NO	NO	X	NO	NO	NO	NO	NO
U1	NO	NO	NO	NO	NO	NO	NO	NO	NO	NO	NO	NO	NO	NO	NO	NO	NO	NO	NO	NO	X	NO	NO
V1	X	X	X	X	X	X	NO	X	X	X	X	X	NO	X	X	X	X	X	X	NO	X	NO	X
V2	X	X	NO	NO	NO	X	X	NO	X	X	NO	NO	X	X	X	NO	X	X	X	X	X	NO	X
V3	X	NO	NO	NO	NO	NO	NO	NO	X	NO	NO	NO	X	NO	NO	NO	NO	NO	NO	NO	NO	X	NO
V4	NO	NO	NO	NO	NO	NO	NO	NO	NO	NO	NO	NO	NO	NO	NO	NO	NO	NO	NO	X	NO	NO	NO
W1	NO	NO	NO	NO	NO	NO	NO	NO	NO	X	NO	NO	NO	NO	NO	NO	NO	NO	NO	NO	NO	NO	NO
W2	NO	NO	NO	NO	X	NO	NO	NO	NO	NO	NO	NO	NO	NO	NO	NO	NO	NO	NO	NO	NO	NO	NO
a1	NO	NO	NO	NO	NO	NO	NO	NO	NO	NO	X	NO	NO	NO	NO	NO	NO	NO	X	NO	NO	NO	NO
a2	NO	NO	NO	NO	NO	NO	NO	NO	X	NO	NO	NO	NO	NO	X	NO	NO	NO	NO	NO	NO	NO	X
a3	NO	NO	NO	X	NO	X	X	NO	X	NO	NO	X	NO	NO	X	NO	X	NO	NO	NO	NO	NO	NO
a4	X	NO	NO	NO	NO	NO	NO	NO	NO	NO	NO	NO	NO	NO	NO	NO	NO	NO	NO	NO	NO	NO	NO
a5	NO	NO	NO	NO	NO	NO	NO	NO	NO	NO	NO	NO	NO	NO	NO	NO	NO	NO	NO	NO	X	NO	NO
a6	NO	NO	NO	NO	NO	NO	NO	NO	NO	X	NO	NO	NO	NO	NO	NO	NO	NO	NO	NO	NO	NO	NO
b1	NO	NO	NO	NO	NO	NO	NO	NO	NO	NO	NO	NO	NO	NO	NO	NO	NO	NO	X	NO	NO	NO	NO
b2	NO	NO	NO	NO	NO	NO	NO	NO	NO	NO	NO	NO	NO	NO	NO	NO	NO	X	NO	NO	NO	NO	NO
b3	NO	NO	X	NO	NO	NO	NO	NO	NO	X	NO	NO	NO	NO	NO	NO	NO	NO	NO	NO	NO	NO	NO
b4	NO	NO	NO	NO	NO	NO	NO	NO	X	NO	NO	NO	X	NO	NO	X	NO	NO	NO	NO	NO	NO	NO
b5	NO	NO	NO	NO	NO	NO	NO	NO	NO	NO	NO	NO	NO	NO	NO	NO	NO	NO	NO	NO	NO	NO	X
b6	NO	NO	NO	NO	NO	NO	NO	NO	NO	NO	NO	X	NO	NO	NO	NO	X	NO	NO	NO	NO	NO	NO
b7	NO	NO	NO	NO	NO	NO	NO	NO	NO	NO	NO	NO	NO	NO	NO	NO	NO	NO	NO	NO	X	NO	NO
b8	NO	NO	NO	NO	X	NO	NO	NO	X	NO	X	NO	NO	NO	NO	NO	NO	NO	NO	NO	NO	NO	NO
b9	NO	NO	NO	NO	NO	X	NO	NO	NO	NO	NO	NO	NO	X	NO	NO	NO	NO	NO	NO	NO	NO	NO
b10	NO	NO	NO	NO	NO	NO	X	NO	NO	NO	NO	NO	NO	NO	X	NO	NO	NO	NO	NO	NO	NO	NO
b11	NO	NO	NO	NO	NO	NO	NO	X	NO	NO	NO	NO	NO	NO	NO	NO	NO	NO	NO	NO	NO	NO	NO
g1	NO	NO	NO	NO	NO	NO	NO	NO	NO	NO	NO	NO	NO	NO	NO	NO	NO	NO	X	NO	NO	NO	NO
g2	NO	NO	X	NO	NO	NO	NO	NO	NO	NO	NO	NO	NO	NO	NO	NO	NO	NO	NO	NO	NO	NO	NO
g3	X	NO	NO	X	NO	X	X	NO	X	X	X	X	X	X	X	NO	X	NO	NO	NO	NO	NO	NO
g4	NO	NO	NO	NO	NO	NO	NO	NO	NO	NO	NO	NO	NO	NO	NO	NO	NO	NO	NO	NO	X	NO	NO
g5	NO	NO	NO	NO	X	NO	NO	NO	NO	NO	NO	NO	NO	NO	NO	NO	NO	NO	NO	NO	NO	NO	NO
g6	NO	NO	NO	NO	NO	NO	NO	X	NO	NO	X	NO	NO	NO	NO	NO	NO	NO	NO	NO	NO	NO	NO
p1	NO	NO	NO	NO	NO	NO	NO	NO	NO	X	NO	NO	NO	NO	NO	NO	NO	X	NO	NO	NO	NO	NO
p2	X	NO	NO	NO	NO	NO	NO	NO	NO	NO	NO	NO	NO	NO	NO	NO	X	NO	NO	NO	NO	NO	NO
p3	NO	NO	NO	X	NO	X	X	NO	X	NO	NO	X	NO	X	X	X	NO	NO	NO	NO	NO	NO	NO
p4	NO	NO	NO	NO	NO	NO	NO	NO	NO	NO	NO	NO	X	NO	NO	NO	NO	NO	NO	NO	NO	NO	NO
p5	NO	NO	NO	NO	NO	NO	NO	NO	NO	NO	NO	NO	NO	NO	NO	NO	NO	NO	NO	NO	NO	NO	X
d1	X	NO	NO	X	NO	NO	X	NO	X	X	X	X	NO	NO	X	NO	NO	NO	NO	NO	NO	NO	NO
d2	NO	NO	NO	NO	NO	NO	NO	NO	NO	NO	NO	NO	NO	NO	NO	NO	X	NO	NO	NO	NO	NO	NO
d3	NO	NO	NO	X	NO	NO	NO	NO	NO	NO	NO	NO	NO	NO	NO	NO	NO	NO	NO	NO	NO	NO	NO
d4	NO	NO	NO	NO	NO	NO	NO	NO	NO	NO	NO	NO	NO	NO	NO	NO	NO	NO	NO	NO	X	NO	NO
d5	NO	NO	NO	NO	NO	NO	NO	NO	NO	NO	NO	NO	NO	NO	NO	NO	NO	NO	NO	NO	NO	NO	X
d6	NO	NO	NO	NO	NO	X	X	NO	NO	NO	X	NO	NO	X	X	NO	NO	NO	NO	NO	NO	NO	NO
e1	NO	NO	NO	NO	NO	NO	NO	NO	NO	NO	NO	NO	NO	NO	NO	NO	NO	NO	X	NO	NO	NO	NO
e2	X	NO	NO	NO	NO	NO	NO	NO	NO	NO	NO	NO	NO	NO	NO	NO	NO	NO	NO	NO	NO	NO	NO
e3	X	NO	NO	NO	NO	NO	NO	NO	NO	NO	NO	NO	NO	NO	NO	NO	NO	NO	NO	NO	NO	NO	NO
e4	NO	NO	NO	NO	NO	NO	NO	NO	NO	NO	NO	X	NO	NO	NO	X	X	NO	NO	NO	NO	NO	NO
e5	NO	NO	NO	NO	NO	NO	NO	NO	NO	NO	NO	NO	X	NO	NO	NO	NO	NO	NO	NO	NO	NO	NO
h1	X	X	NO	X	NO	X	X	NO	X	X	X	X	X	X	X	X	X	NO	X	NO	X	NO	NO
h2	NO	NO	X	NO	NO	NO	NO	NO	NO	NO	NO	NO	NO	NO	NO	NO	NO	NO	NO	NO	NO	NO	NO
h3	NO	NO	NO	NO	NO	NO	NO	NO	NO	NO	NO	NO	NO	NO	NO	NO	NO	NO	NO	NO	NO	NO	X
h4	NO	NO	NO	NO	X	NO	NO	NO	NO	NO	NO	NO	NO	NO	NO	NO	NO	NO	NO	NO	X	NO	NO
h5	NO	NO	NO	X	NO	NO	NO	NO	NO	NO	NO	NO	NO	NO	NO	NO	NO	NO	NO	X	NO	NO	NO
q1	NO	NO	NO	NO	NO	NO	NO	NO	NO	NO	NO	NO	NO	NO	NO	NO	NO	X	X	NO	NO	X	NO
q2	NO	NO	NO	NO	X	NO	NO	NO	NO	NO	NO	NO	NO	NO	NO	NO	NO	NO	NO	NO	NO	NO	NO
q3	NO	NO	NO	NO	NO	NO	NO	NO	NO	X	NO	NO	NO	NO	NO	NO	NO	NO	NO	NO	NO	NO	NO
q4	NO	NO	NO	NO	NO	X	NO	NO	NO	NO	NO	NO	NO	NO	NO	NO	NO	NO	NO	NO	NO	NO	NO
q5	NO	NO	NO	NO	X	NO	NO	NO	NO	NO	NO	NO	NO	NO	NO	NO	NO	NO	NO	NO	NO	NO	NO
i1	NO	NO	NO	NO	X	NO	NO	NO	NO	NO	NO	NO	NO	NO	NO	NO	NO	NO	NO	NO	NO	NO	NO
k1	NO	NO	NO	NO	NO	NO	NO	X	NO	NO	NO	NO	NO	NO	NO	NO	NO	NO	NO	NO	NO	NO	NO
k2	NO	NO	X	NO	NO	NO	NO	NO	NO	NO	NO	NO	NO	NO	NO	NO	NO	NO	NO	NO	NO	NO	NO
k3	NO	NO	NO	NO	NO	NO	NO	NO	NO	NO	NO	NO	NO	NO	NO	NO	NO	NO	NO	NO	NO	NO	X
k4	NO	NO	NO	NO	NO	NO	NO	NO	NO	NO	NO	NO	NO	NO	NO	NO	NO	NO	NO	NO	NO	NO	X
k5	NO	NO	NO	NO	NO	NO	NO	NO	NO	NO	NO	NO	NO	NO	NO	NO	NO	NO	NO	NO	NO	NO	NO
l1	NO	X	X	X	X	NO	X	NO	NO	NO	NO	NO	X	NO	NO	NO	NO	NO	NO	X	X	NO	NO
l2	NO	NO	NO	NO	NO	NO	NO	NO	NO	NO	NO	NO	NO	NO	NO	NO	NO	NO	X	NO	X	NO	X
l3	NO	NO	NO	NO	NO	NO	NO	NO	NO	NO	NO	NO	NO	NO	NO	NO	NO	NO	X	NO	NO	NO	NO
l4	NO	NO	NO	NO	NO	NO	NO	NO	NO	X	NO	NO	NO	NO	NO	NO	NO	NO	NO	NO	NO	X	NO
m1	NO	NO	X	NO	NO	NO	NO	NO	NO	NO	X	NO	NO	NO	NO	NO	NO	NO	NO	NO	NO	NO	NO
m2	X	NO	NO	X	NO	NO	NO	NO	X	X	X	X	X	X	X	X	X	X	NO	NO	NO	NO	NO
m3	NO	NO	NO	NO	NO	NO	NO	NO	NO	NO	NO	NO	NO	NO	NO	NO	NO	NO	NO	NO	X	NO	NO
m4	NO	NO	NO	NO	NO	NO	NO	NO	NO	NO	NO	NO	NO	NO	NO	NO	NO	NO	NO	NO	NO	NO	X
m5	NO	NO	NO	NO	NO	NO	NO	NO	NO	NO	NO	NO	NO	NO	NO	NO	NO	NO	X	NO	NO	NO	NO
n1	NO	X	NO	NO	NO	NO	NO	NO	NO	NO	NO	NO	NO	NO	NO	NO	NO	NO	NO	NO	NO	NO	NO
n2	NO	NO	NO	NO	NO	NO	NO	NO	NO	X	NO	NO	NO	NO	NO	NO	NO	NO	NO	NO	NO	NO	NO
n3	NO	NO	NO	NO	NO	NO	NO	NO	NO	NO	NO	NO	NO	NO	NO	NO	NO	NO	NO	NO	X	NO	NO
n4	NO	NO	NO	NO	NO	NO	NO	NO	NO	NO	NO	NO	X	NO	NO	NO	NO	NO	NO	NO	NO	NO	NO
n5	NO	NO	NO	NO	NO	NO	NO	NO	NO	NO	NO	NO	NO	NO	NO	NO	NO	NO	NO	NO	NO	X	NO
z1	NO	NO	NO	NO	NO	NO	NO	NO	NO	NO	NO	NO	NO	NO	NO	NO	NO	NO	X	NO	NO	NO	NO
z2	NO	NO	X	NO	NO	X	X	NO	NO	X	NO	NO	NO	NO	NO	NO	NO	NO	NO	X	NO	NO	NO
z3	NO	NO	NO	NO	NO	NO	NO	NO	NO	NO	NO	NO	NO	NO	NO	NO	NO	NO	NO	NO	NO	NO	X
x1	NO	NO	NO	NO	NO	NO	NO	NO	NO	NO	NO	NO	NO	NO	NO	NO	NO	NO	X	NO	NO	NO	NO
x2	NO	NO	NO	NO	NO	NO	NO	NO	NO	NO	NO	NO	NO	NO	NO	NO	NO	NO	NO	NO	X	NO	NO
x3	NO	NO	NO	NO	NO	NO	NO	NO	NO	NO	NO	NO	NO	NO	NO	NO	NO	NO	NO	NO	NO	NO	X
o1	NO	X	NO	NO	NO	NO	NO	NO	NO	NO	NO	NO	NO	NO	NO	NO	NO	NO	NO	NO	NO	NO	NO
o2	NO	NO	NO	NO	NO	NO	NO	NO	NO	NO	NO	NO	NO	NO	NO	NO	NO	NO	NO	X	NO	NO	NO
o3	NO	X	NO	NO	NO	NO	NO	NO	NO	NO	NO	NO	NO	NO	NO	NO	NO	NO	NO	NO	NO	NO	NO
o4	NO	NO	NO	NO	NO	NO	NO	NO	NO	NO	NO	NO	NO	NO	NO	NO	NO	NO	NO	NO	NO	NO	X
o5	NO	NO	NO	NO	NO	NO	NO	X	NO	NO	NO	NO	NO	NO	NO	NO	NO	NO	NO	NO	NO	NO	NO
o6	NO	NO	NO	X	NO	NO	NO	NO	X	NO	NO	NO	X	NO	NO	X	NO	NO	NO	NO	NO	NO	NO
o7	NO	NO	NO	NO	NO	NO	NO	NO	NO	X	NO	NO	NO	NO	NO	NO	NO	NO	NO	NO	NO	X	NO
